# Supplementary material for: Integrated network reconstruction, visualization and analysis using YANAsquare
Source: PubMed Central journal article supplement (PMC2020486; doi:10.1186/1471-2105-8-313), 2007-08-28
Supplement: 1471-2105-8-313-S1.pdf [file 1471-2105-8-313-S1.pdf]

**Table 1: Reduced phagosome network - metabolites**

| <b>Name</b>   | <b>internal?</b> | <b>Connectivity</b> |
|---------------|------------------|---------------------|
| AA            | false            | 1                   |
| Ac-sph        | true             | 2                   |
| Actin         | false            | 2                   |
| Actinpoly     | false            | 2                   |
| ADP           | true             | 7                   |
| ATP           | true             | 7                   |
| CDP-cholin    | false            | 2                   |
| CDP-DAG       | true             | 2                   |
| cholin        | true             | 3                   |
| cholinP       | true             | 4                   |
| CMP           | false            | 2                   |
| CTP           | false            | 2                   |
| DAG           | true             | 7                   |
| DAG-3P        | false            | 1                   |
| ERM           | true             | 2                   |
| ERM-PIP2      | false            | 1                   |
| Ezrin         | false            | 1                   |
| fatac         | false            | 3                   |
| IcP           | false            | 1                   |
| inositol      | false            | 1                   |
| inositolTP    | false            | 1                   |
| monoAGcholinP | true             | 2                   |
| P             | false            | 2                   |
| PA            | false            | 3                   |
| PC            | false            | 4                   |
| PI            | false            | 3                   |
| PIP           | true             | 2                   |
| PIP2          | true             | 3                   |
| PPi           | false            | 2                   |
| S-1-P         | false            | 1                   |
| sph           | false            | 2                   |
| Sphmy         | false            | 1                   |
| TAG           | false            | 1                   |
| TM            | false            | 1                   |

**Table 2: Reduced phagosome network - reactions**

| <b>Enzyme name</b> | <b>reversible?</b> | <b>Reaction equation</b>                   |
|--------------------|--------------------|--------------------------------------------|
| Actindepoly        | false              | Actinpoly = 2 Actin                        |
| Actinnucl          | false              | ATP + 2 Actin = ADP + Actinpoly + P        |
| CDPinoitra         | true               | CDP-DAG + inositol = CMP + PI              |
| CDPsynth           | false              | CTP + PA = CDP-DAG + PPi                   |
| ceramidse          | true               | Ac-sph = fatac + sph                       |
| Cholinkin          | true               | ATP + cholin = ADP + cholinP               |
| CholinPtf          | true               | CTP + cholinP = CDP-cholin + PPi           |
| DAGchoIT           | true               | CMP + PC = CDP-cholin + DAG                |
| DAGkin             | true               | ATP + DAG = ADP + DAG-3P                   |
| ERMfform           | true               | ERM + PIP2 = ERM-PIP2                      |
| ERMform            | true               | Ezrin + TM = ERM                           |
| Lipase             | true               | TAG = DAG + fatac                          |
| monoAGcholinPCtf   | true               | ADP + monoAGcholinP = ATP + cholin + fatac |
| PAP                | true               | PA = DAG + P                               |
| PI45diase          | false              | PIP2 = DAG + inositolP                     |
| PI4kin             | true               | ATP + PI = ADP + PIP                       |
| PI4P5kin           | true               | ATP + PIP = ADP + PIP2                     |
| PIdiase            | false              | PI = DAG + IcP                             |
| PLA2               | true               | PC = AA + monoAGcholinP                    |
| PLC                | true               | PC = DAG + cholinP                         |
| PLD                | true               | PC = PA + cholin                           |
| Sphmydias          | true               | Sphmy = Ac-sph + cholinP                   |
| SPK                | true               | ATP + sph = ADP + S-1-P                    |

**Table 3: Reduced phagosome network - Elementary Modes<sup>1</sup>**

| #  | Flux sum | Rev.? | Pathlength | Reactions                                                                                    | Net reaction                                                                |
|----|----------|-------|------------|----------------------------------------------------------------------------------------------|-----------------------------------------------------------------------------|
| 1  | 4        | true  | 4          | (-1 monoAGcholinPctf) (-1 PLA2) (1 PLD) (-1 SPK)                                             | AA + S-1-P + fatac = PA + sph                                               |
| 2  | 2        | true  | 2          | (1 Lipase) (-1 PAP)                                                                          | P + TAG = PA + fatac                                                        |
| 3  | 6        | true  | 5          | (-1 ERMfform) (-1 ERMform) (-1 PI4kin) (-1 PI4P5kin) (2 SPK)                                 | ERM-PIP2 + 2 sph = Ezrin + PI + 2 S-1-P + TM                                |
| 4  | 10       | true  | 7          | (-1 ERMfform) (-1 ERMform) (-2 monoAGcholinPctf) (-1 PI4kin) (-1 PI4P5kin) (-2 PLA2) (2 PLD) | 2 AA + ERM-PIP2 + 2 fatac = Ezrin + 2 PA + PI + TM                          |
| 5  | 3        | true  | 3          | (-1 DAGkin) (-1 PAP) (1 SPK)                                                                 | DAG-3P + P + sph = PA + S-1-P                                               |
| 6  | 5        | true  | 5          | (1 DAGkin) (1 monoAGcholinPctf) (1 PAP) (1 PLA2) (-1 PLD)                                    | 2 PA = AA + DAG-3P + P + fatac                                              |
| 7  | 3        | true  | 3          | (-1 DAGkin) (-1 Lipase) (1 SPK)                                                              | DAG-3P + fatac + sph = S-1-P + TAG                                          |
| 8  | 5        | true  | 5          | (1 DAGkin) (1 Lipase) (1 monoAGcholinPctf) (1 PLA2) (-1 PLD)                                 | PA + TAG = AA + DAG-3P + 2 fatac                                            |
| 9  | 8        | true  | 6          | (-2 DAGkin) (1 ERMfform) (1 ERMform) (-2 PAP) (1 PI4kin) (1 PI4P5kin)                        | 2 DAG-3P + Ezrin + 2 P + PI + TM = ERM-PIP2 + 2 PA                          |
| 10 | 8        | true  | 6          | (-2 DAGkin) (1 ERMfform) (1 ERMform) (-2 Lipase) (1 PI4kin) (1 PI4P5kin)                     | 2 DAG-3P + Ezrin + PI + TM + 2 fatac = ERM-PIP2 + 2 TAG                     |
| 11 | 2        | true  | 2          | (1 DAGcholT) (-1 PAP)                                                                        | CMP + P + PC = CDP-cholin + PA                                              |
| 12 | 2        | true  | 2          | (1 DAGcholT) (-1 Lipase)                                                                     | CMP + PC + fatac = CDP-cholin + TAG                                         |
| 13 | 3        | true  | 3          | (-1 DAGcholT) (-1 DAGkin) (1 SPK)                                                            | CDP-cholin + DAG-3P + sph = CMP + PC + S-1-P                                |
| 14 | 5        | true  | 5          | (1 DAGcholT) (1 DAGkin) (1 monoAGcholinPctf) (1 PLA2) (-1 PLD)                               | CMP + PA + PC = AA + CDP-cholin + DAG-3P + fatac                            |
| 15 | 8        | true  | 6          | (-2 DAGcholT) (-2 DAGkin) (1 ERMfform) (1 ERMform) (1 PI4kin) (1 PI4P5kin)                   | 2 CDP-cholin + 2 DAG-3P + Ezrin + PI + TM = 2 CMP + ERM-PIP2 + 2 PC         |
| 16 | 3        | true  | 3          | (-1 CholinPtf) (1 PAP) (-1 PLC)                                                              | CDP-cholin + PA + PPi = CTP + P + PC                                        |
| 17 | 3        | true  | 3          | (-1 CholinPtf) (1 Lipase) (-1 PLC)                                                           | CDP-cholin + PPi + TAG = CTP + PC + fatac                                   |
| 18 | 4        | true  | 4          | (-1 CholinPtf) (-1 DAGkin) (-1 PLC) (1 SPK)                                                  | CDP-cholin + DAG-3P + PPi + sph = CTP + PC + S-1-P                          |
| 19 | 6        | true  | 6          | (-1 CholinPtf) (-1 DAGkin) (-1 monoAGcholinPctf) (-1 PLA2) (-1 PLC) (1 PLD)                  | AA + CDP-cholin + DAG-3P + PPi + fatac = CTP + PA + PC                      |
| 20 | 10       | true  | 7          | (2 CholinPtf) (2 DAGkin) (-1 ERMfform) (-1 ERMform) (-1 PI4kin) (-1 PI4P5kin) (2 PLC)        | 2 CTP + ERM-PIP2 + 2 PC = 2 CDP-cholin + 2 DAG-3P + Ezrin + PI + 2 PPi + TM |
| 21 | 3        | true  | 3          | (-1 CholinPtf) (1 DAGcholT) (-1 PLC)                                                         | CMP + PPi = CTP                                                             |
| 22 | 5        | true  | 5          | (-1 Cholinkin) (-1 PAP) (1 PLC) (-1 PLD) (1 SPK)                                             | P + sph = S-1-P                                                             |
| 23 | 5        | true  | 5          | (-1 Cholinkin) (-1 monoAGcholinPctf) (-1 PAP) (-1 PLA2) (1 PLC)                              | AA + P + fatac = PA                                                         |
| 24 | 5        | true  | 5          | (-1 Cholinkin) (-1 Lipase) (1 PLC) (-1 PLD) (1 SPK)                                          | PA + fatac + sph = S-1-P + TAG                                              |

small phagosome EMs

|    |    |      |   |                                                                                                                    |                                                                          |
|----|----|------|---|--------------------------------------------------------------------------------------------------------------------|--------------------------------------------------------------------------|
| 25 | 5  | true | 5 | (-1 Cholin) (-1 Lipase) (-1 monoAGcholinPctf) (-1 PLA2) (1 PLC)                                                    | AA + 2 fatic = TAG                                                       |
| 26 | 12 | true | 8 | (2 Cholin) (-1 ERMform) (-1 ERMform) (2 PAP) (-1 PI4kin) (-1 PI4P5kin) (-2 PLC) (2 PLD)                            | ERM-PIP2 = Ezrin + 2 P + PI + TM                                         |
| 27 | 12 | true | 8 | (2 Cholin) (-1 ERMform) (-1 ERMform) (2 Lipase) (-1 PI4kin) (-1 PI4P5kin) (-2 PLC) (2 PLD)                         | ERM-PIP2 + 2 TAG = Ezrin + 2 PA + PI + TM + 2 fatic                      |
| 28 | 4  | true | 4 | (-1 Cholin) (1 DAGkin) (1 PLC) (-1 PLD)                                                                            | PA = DAG-3P                                                              |
| 29 | 6  | true | 6 | (-1 Cholin) (1 DAGkin) (-1 monoAGcholinPctf) (-1 PLA2) (1 PLC) (-1 SPK)                                            | AA + S-1-P + fatic = DAG-3P + sph                                        |
| 30 | 14 | true | 9 | (-2 Cholin) (2 DAGkin) (-1 ERMform) (-1 ERMform) (-2 monoAGcholinPctf) (-1 PI4kin) (-1 PI4P5kin) (-2 PLA2) (2 PLC) | 2 AA + ERM-PIP2 + 2 fatic = 2 DAG-3P + Ezrin + PI + TM                   |
| 31 | 5  | true | 5 | (-1 Cholin) (-1 DAGcholT) (1 PLC) (-1 PLD) (1 SPK)                                                                 | CDP-cholin + PA + sph = CMP + PC + S-1-P                                 |
| 32 | 5  | true | 5 | (-1 Cholin) (-1 DAGcholT) (-1 monoAGcholinPctf) (-1 PLA2) (1 PLC)                                                  | AA + CDP-cholin + fatic = CMP + PC                                       |
| 33 | 12 | true | 8 | (2 Cholin) (2 DAGcholT) (-1 ERMform) (-1 ERMform) (-1 PI4kin) (-1 PI4P5kin) (-2 PLC) (2 PLD)                       | 2 CMP + ERM-PIP2 + 2 PC = 2 CDP-cholin + Ezrin + 2 PA + PI + TM          |
| 34 | 4  | true | 4 | (-1 Cholin) (-1 CholinPtf) (-1 PLD) (1 SPK)                                                                        | CDP-cholin + PA + PPI + sph = CTP + PC + S-1-P                           |
| 35 | 4  | true | 4 | (-1 Cholin) (-1 CholinPtf) (-1 monoAGcholinPctf) (-1 PLA2)                                                         | AA + CDP-cholin + PPI + fatic = CTP + PC                                 |
| 36 | 10 | true | 7 | (2 Cholin) (2 CholinPtf) (-1 ERMform) (-1 ERMform) (-1 PI4kin) (-1 PI4P5kin) (2 PLD)                               | 2 CTP + ERM-PIP2 + 2 PC = 2 CDP-cholin + Ezrin + 2 PA + PI + 2 PPI + TM  |
| 37 | 5  | true | 5 | (1 Cholin) (1 CholinPtf) (-1 DAGkin) (-1 PAP) (1 PLD)                                                              | CTP + DAG-3P + P + PC = CDP-cholin + 2 PA + PPI                          |
| 38 | 5  | true | 5 | (1 Cholin) (1 CholinPtf) (-1 DAGkin) (-1 Lipase) (1 PLD)                                                           | CTP + DAG-3P + PC + fatic = CDP-cholin + PA + PPI + TAG                  |
| 39 | 5  | true | 5 | (1 Cholin) (1 CholinPtf) (-1 DAGcholT) (-1 DAGkin) (1 PLD)                                                         | CTP + DAG-3P = CMP + PA + PPI                                            |
| 40 | 4  | true | 4 | (-1 ceramide) (-1 PAP) (1 PLC) (-1 Sphmydias)                                                                      | P + PC + fatic + sph = PA + Sphmy                                        |
| 41 | 4  | true | 4 | (-1 ceramide) (-1 Lipase) (1 PLC) (-1 Sphmydias)                                                                   | PC + 2 fatic + sph = Sphmy + TAG                                         |
| 42 | 5  | true | 5 | (-1 ceramide) (1 DAGkin) (1 PLC) (-1 Sphmydias) (-1 SPK)                                                           | PC + S-1-P + fatic = DAG-3P + Sphmy                                      |
| 43 | 7  | true | 7 | (-1 ceramide) (1 DAGkin) (1 monoAGcholinPctf) (1 PLA2) (1 PLC) (-1 PLD) (-1 Sphmydias)                             | PA + PC + sph = AA + DAG-3P + Sphmy                                      |
| 44 | 12 | true | 8 | (2 ceramide) (-2 DAGkin) (1 ERMform) (1 ERMform) (1 PI4kin) (1 PI4P5kin) (-2 PLC) (2 Sphmydias)                    | 2 DAG-3P + Ezrin + PI + 2 Sphmy + TM = ERM-PIP2 + 2 PC + 2 fatic + 2 sph |
| 45 | 4  | true | 4 | (-1 ceramide) (-1 DAGcholT) (1 PLC) (-1 Sphmydias)                                                                 | CDP-cholin + fatic + sph = CMP + Sphmy                                   |
| 46 | 3  | true | 3 | (1 ceramide) (1 CholinPtf) (1 Sphmydias)                                                                           | CTP + Sphmy = CDP-cholin + PPI + fatic + sph                             |
| 47 | 5  | true | 5 | (-1 ceramide) (1 Cholin) (1 PLD) (-1 Sphmydias) (-1 SPK)                                                           | PC + S-1-P + fatic = PA + Sphmy                                          |

small phagosome EMs

|    |    |       |   |                                                                                                      |                                                                      |
|----|----|-------|---|------------------------------------------------------------------------------------------------------|----------------------------------------------------------------------|
| 48 | 5  | true  | 5 | (-1 ceramidse) (1 Cholinkin) (1 monoAGcholinPctf) (1 PLA2) (-1 Sphmydias)                            | PC + sph = AA + Sphmy                                                |
| 49 | 12 | true  | 8 | (2 ceramidse) (-2 Cholinkin) (1 ERMfform) (1 ERMform) (1 PI4kin) (1 PI4P5kin) (-2 PLD) (2 Sphmydias) | Ezrin + 2 PA + PI + 2 Sphmy + TM = ERM-PIP2 + 2 PC + 2 fatac + 2 sph |
| 50 | 6  | true  | 6 | (1 ceramidse) (-1 Cholinkin) (1 DAGkin) (1 PAP) (-1 PLD) (1 Sphmydias)                               | 2 PA + Sphmy = DAG-3P + P + PC + fatac + sph                         |
| 51 | 6  | true  | 6 | (1 ceramidse) (-1 Cholinkin) (1 DAGkin) (1 Lipase) (-1 PLD) (1 Sphmydias)                            | PA + Sphmy + TAG = DAG-3P + PC + 2 fatac + sph                       |
| 52 | 6  | true  | 6 | (1 ceramidse) (-1 Cholinkin) (1 DAGcholT) (1 DAGkin) (-1 PLD) (1 Sphmydias)                          | CMP + PA + Sphmy = CDP-cholin + DAG-3P + fatac + sph                 |
| 53 | 2  | false | 2 | (-1 PAP) (1 Pldiase)                                                                                 | P + PI = IcP + PA                                                    |
| 54 | 2  | false | 2 | (-1 Lipase) (1 Pldiase)                                                                              | PI + fatac = IcP + TAG                                               |
| 55 | 3  | false | 3 | (1 DAGkin) (1 Pldiase) (-1 SPK)                                                                      | PI + S-1-P = DAG-3P + IcP + sph                                      |
| 56 | 5  | false | 5 | (1 DAGkin) (1 monoAGcholinPctf) (1 Pldiase) (1 PLA2) (-1 PLD)                                        | PA + PI = AA + DAG-3P + IcP + fatac                                  |
| 57 | 8  | false | 6 | (2 DAGkin) (-1 ERMfform) (-1 ERMform) (-1 PI4kin) (-1 PI4P5kin) (2 Pldiase)                          | ERM-PIP2 + PI = 2 DAG-3P + Ezrin + 2 IcP + TM                        |
| 58 | 2  | false | 2 | (-1 DAGcholT) (1 Pldiase)                                                                            | CDP-cholin + PI = CMP + IcP + PC                                     |
| 59 | 3  | false | 3 | (-1 CholinPtf) (1 Pldiase) (-1 PLC)                                                                  | CDP-cholin + PI + PPI = CTP + IcP + PC                               |
| 60 | 5  | false | 5 | (1 Cholinkin) (1 Pldiase) (-1 PLC) (1 PLD) (-1 SPK)                                                  | PI + S-1-P = IcP + PA + sph                                          |
| 61 | 5  | false | 5 | (1 Cholinkin) (1 monoAGcholinPctf) (1 Pldiase) (1 PLA2) (-1 PLC)                                     | PI = AA + IcP + fatac                                                |
| 62 | 12 | false | 8 | (2 Cholinkin) (-1 ERMfform) (-1 ERMform) (-1 PI4kin) (-1 PI4P5kin) (2 Pldiase) (-2 PLC) (2 PLD)      | ERM-PIP2 + PI = Ezrin + 2 IcP + 2 PA + TM                            |
| 63 | 5  | false | 5 | (-1 Cholinkin) (-1 CholinPtf) (1 DAGkin) (1 Pldiase) (-1 PLD)                                        | CDP-cholin + PA + PI + PPI = CTP + DAG-3P + IcP + PC                 |
| 64 | 4  | false | 4 | (1 ceramidse) (1 Pldiase) (-1 PLC) (1 Sphmydias)                                                     | PI + Sphmy = IcP + PC + fatac + sph                                  |
| 65 | 6  | false | 6 | (1 ceramidse) (-1 Cholinkin) (1 DAGkin) (1 Pldiase) (-1 PLD) (1 Sphmydias)                           | PA + PI + Sphmy = DAG-3P + IcP + PC + fatac + sph                    |
| 66 | 6  | false | 5 | (-1 PAP) (1 PI45diase) (1 PI4kin) (1 PI4P5kin) (-2 SPK)                                              | P + PI + 2 S-1-P = PA + inositolTP + 2 sph                           |
| 67 | 10 | false | 7 | (2 monoAGcholinPctf) (-1 PAP) (1 PI45diase) (1 PI4kin) (1 PI4P5kin) (2 PLA2) (-2 PLD)                | P + PA + PI = 2 AA + 2 fatac + inositolTP                            |
| 68 | 6  | false | 5 | (-1 Lipase) (1 PI45diase) (1 PI4kin) (1 PI4P5kin) (-2 SPK)                                           | PI + 2 S-1-P + fatac = TAG + inositolTP + 2 sph                      |
| 69 | 10 | false | 7 | (-1 Lipase) (2 monoAGcholinPctf) (1 PI45diase) (1 PI4kin) (1 PI4P5kin) (2 PLA2) (-2 PLD)             | 2 PA + PI = 2 AA + TAG + fatac + inositolTP                          |
| 70 | 4  | false | 4 | (-1 ERMfform) (-1 ERMform) (-1 PAP) (1 PI45diase)                                                    | ERM-PIP2 + P = Ezrin + PA + TM + inositolTP                          |
| 71 | 4  | false | 4 | (-1 ERMfform) (-1 ERMform) (-1 Lipase) (1 PI45diase)                                                 | ERM-PIP2 + fatac = Ezrin + TAG + TM + inositolTP                     |

small phagosome EMs

|    |    |       |   |                                                                                                      |                                                                       |
|----|----|-------|---|------------------------------------------------------------------------------------------------------|-----------------------------------------------------------------------|
| 72 | 7  | false | 5 | (1 DAGkin) (1 PI45diase) (1 PI4kin) (1 PI4P5kin) (-3 SPK)                                            | PI + 3 S-1-P = DAG-3P + inositolTP + 3 sph                            |
| 73 | 8  | false | 5 | (-2 DAGkin) (-3 PAP) (1 PI45diase) (1 PI4kin) (1 PI4P5kin)                                           | 2 DAG-3P + 3 P + PI = 3 PA + inositolTP                               |
| 74 | 13 | false | 7 | (1 DAGkin) (3 monoAGcholinPCtf) (1 PI45diase) (1 PI4kin) (1 PI4P5kin) (3 PLA2) (-3 PLD)              | 3 PA + PI = 3 AA + DAG-3P + 3 fatac + inositolTP                      |
| 75 | 8  | false | 5 | (-2 DAGkin) (-3 Lipase) (1 PI45diase) (1 PI4kin) (1 PI4P5kin)                                        | 2 DAG-3P + PI + 3 fatac = 3 TAG + inositolTP                          |
| 76 | 5  | false | 5 | (1 DAGkin) (-1 ERMfform) (-1 ERMform) (1 PI45diase) (-1 SPK)                                         | ERM-PIP2 + S-1-P = DAG-3P + Ezrin + TM + inositolTP + sph             |
| 77 | 12 | false | 6 | (2 DAGkin) (-3 ERMfform) (-3 ERMform) (2 PI45diase) (-1 PI4kin) (-1 PI4P5kin)                        | 3 ERM-PIP2 = 2 DAG-3P + 3 Ezrin + PI + 3 TM + 2 inositolTP            |
| 78 | 7  | false | 7 | (1 DAGkin) (-1 ERMfform) (-1 ERMform) (1 monoAGcholinPCtf) (1 PI45diase) (1 PLA2) (-1 PLD)           | ERM-PIP2 + PA = AA + DAG-3P + Ezrin + TM + fatac + inositolTP         |
| 79 | 6  | false | 5 | (-1 DAGcholT) (1 PI45diase) (1 PI4kin) (1 PI4P5kin) (-2 SPK)                                         | CDP-cholin + PI + 2 S-1-P = CMP + PC + inositolTP + 2 sph             |
| 80 | 10 | false | 7 | (-1 DAGcholT) (2 monoAGcholinPCtf) (1 PI45diase) (1 PI4kin) (1 PI4P5kin) (2 PLA2) (-2 PLD)           | CDP-cholin + 2 PA + PI = 2 AA + CMP + PC + 2 fatac + inositolTP       |
| 81 | 4  | false | 4 | (-1 DAGcholT) (-1 ERMfform) (-1 ERMform) (1 PI45diase)                                               | CDP-cholin + ERM-PIP2 = CMP + Ezrin + PC + TM + inositolTP            |
| 82 | 8  | false | 5 | (-3 DAGcholT) (-2 DAGkin) (1 PI45diase) (1 PI4kin) (1 PI4P5kin)                                      | 3 CDP-cholin + 2 DAG-3P + PI = 3 CMP + 3 PC + inositolTP              |
| 83 | 7  | false | 6 | (-1 CholinPtf) (1 PI45diase) (1 PI4kin) (1 PI4P5kin) (-1 PLC) (-2 SPK)                               | CDP-cholin + PI + PPI + 2 S-1-P = CTP + PC + inositolTP + 2 sph       |
| 84 | 11 | false | 8 | (-1 CholinPtf) (2 monoAGcholinPCtf) (1 PI45diase) (1 PI4kin) (1 PI4P5kin) (2 PLA2) (-1 PLC) (-2 PLD) | CDP-cholin + 2 PA + PI + PPI = 2 AA + CTP + PC + 2 fatac + inositolTP |
| 85 | 5  | false | 5 | (-1 CholinPtf) (-1 ERMfform) (-1 ERMform) (1 PI45diase) (-1 PLC)                                     | CDP-cholin + ERM-PIP2 + PPI = CTP + Ezrin + PC + TM + inositolTP      |
| 86 | 11 | false | 6 | (-3 CholinPtf) (-2 DAGkin) (1 PI45diase) (1 PI4kin) (1 PI4P5kin) (-3 PLC)                            | 3 CDP-cholin + 2 DAG-3P + PI + 3 PPI = 3 CTP + 3 PC + inositolTP      |
| 87 | 9  | false | 7 | (1 Cholinkin) (1 PI45diase) (1 PI4kin) (1 PI4P5kin) (-1 PLC) (1 PLD) (-3 SPK)                        | PI + 3 S-1-P = PA + inositolTP + 3 sph                                |
| 88 | 12 | false | 7 | (-2 Cholinkin) (-3 PAP) (1 PI45diase) (1 PI4kin) (1 PI4P5kin) (2 PLC) (-2 PLD)                       | 3 P + PI = PA + inositolTP                                            |
| 89 | 9  | false | 8 | (1 Cholinkin) (1 monoAGcholinPCtf) (1 PI45diase) (1 PI4kin) (1 PI4P5kin) (1 PLA2) (-1 PLC) (-2 SPK)  | PI + 2 S-1-P = AA + fatac + inositolTP + 2 sph                        |
| 90 | 13 | false | 8 | (1 Cholinkin) (3 monoAGcholinPCtf) (1 PI45diase) (1 PI4kin) (1 PI4P5kin) (3 PLA2) (-1 PLC) (-2 PLD)  | 2 PA + PI = 3 AA + 3 fatac + inositolTP                               |
| 91 | 12 | false | 7 | (-2 Cholinkin) (-3 Lipase) (1 PI45diase) (1 PI4kin) (1 PI4P5kin) (2 PLC) (-2 PLD)                    | 2 PA + PI + 3 fatac = 3 TAG + inositolTP                              |

small phagosome EMs

|     |    |       |   |                                                                                                                   |                                                                                |
|-----|----|-------|---|-------------------------------------------------------------------------------------------------------------------|--------------------------------------------------------------------------------|
| 92  | 7  | false | 7 | (1 Cholinkin) (-1 ERMfform) (-1 ERMform) (1 PI45diase) (-1 PLC) (1 PLD) (-1 SPK)                                  | ERM-PIP2 + S-1-P = Ezrin + PA + TM + inositolTP + sph                          |
| 93  | 16 | false | 8 | (2 Cholinkin) (-3 ERMfform) (-3 ERMform) (2 PI45diase) (-1 PI4kin) (-1 PI4P5kin) (-2 PLC) (2 PLD)                 | 3 ERM-PIP2 = 3 Ezrin + 2 PA + PI + 3 TM + 2 inositolTP                         |
| 94  | 7  | false | 7 | (1 Cholinkin) (-1 ERMfform) (-1 ERMform) (1 monoAGcholinPctf) (1 PI45diase) (1 PLA2) (-1 PLC)                     | ERM-PIP2 = AA + Ezrin + TM + fatak + inositolTP                                |
| 95  | 17 | false | 8 | (3 Cholinkin) (-2 DAGkin) (3 monoAGcholinPctf) (1 PI45diase) (1 PI4kin) (1 PI4P5kin) (3 PLA2) (-3 PLC)            | 2 DAG-3P + PI = 3 AA + 3 fatak + inositolTP                                    |
| 96  | 12 | false | 7 | (-2 Cholinkin) (-3 DAGchoIT) (1 PI45diase) (1 PI4kin) (1 PI4P5kin) (2 PLC) (-2 PLD)                               | 3 CDP-cholin + 2 PA + PI = 3 CMP + 3 PC + inositolTP                           |
| 97  | 11 | false | 7 | (-2 Cholinkin) (-3 CholinPtf) (1 PI45diase) (1 PI4kin) (1 PI4P5kin) (-1 PLC) (-2 PLD)                             | 3 CDP-cholin + 2 PA + PI + 3 PPI = 3 CTP + 3 PC + inositolTP                   |
| 98  | 10 | false | 7 | (-2 Cholinkin) (-2 CholinPtf) (-1 PAP) (1 PI45diase) (1 PI4kin) (1 PI4P5kin) (-2 PLD)                             | 2 CDP-cholin + P + PA + PI + 2 PPI = 2 CTP + 2 PC + inositolTP                 |
| 99  | 10 | false | 7 | (-2 Cholinkin) (-2 CholinPtf) (-1 Lipase) (1 PI45diase) (1 PI4kin) (1 PI4P5kin) (-2 PLD)                          | 2 CDP-cholin + 2 PA + PI + 2 PPI + fatak = 2 CTP + 2 PC + TAG + inositolTP     |
| 100 | 13 | false | 7 | (-3 Cholinkin) (-3 CholinPtf) (1 DAGkin) (1 PI45diase) (1 PI4kin) (1 PI4P5kin) (-3 PLD)                           | 3 CDP-cholin + 3 PA + PI + 3 PPI = 3 CTP + DAG-3P + 3 PC + inositolTP          |
| 101 | 7  | false | 7 | (-1 Cholinkin) (-1 CholinPtf) (1 DAGkin) (-1 ERMfform) (-1 ERMform) (1 PI45diase) (-1 PLD)                        | CDP-cholin + ERM-PIP2 + PA + PPI = CTP + DAG-3P + Ezrin + PC + TM + inositolTP |
| 102 | 10 | false | 7 | (-2 Cholinkin) (-2 CholinPtf) (-1 DAGchoIT) (1 PI45diase) (1 PI4kin) (1 PI4P5kin) (-2 PLD)                        | 3 CDP-cholin + 2 PA + PI + 2 PPI = CMP + 2 CTP + 3 PC + inositolTP             |
| 103 | 8  | false | 7 | (1 ceramidse) (1 PI45diase) (1 PI4kin) (1 PI4P5kin) (-1 PLC) (1 Sphmydias) (-2 SPK)                               | PI + 2 S-1-P + Sphmy = PC + fatak + inositolTP + 3 sph                         |
| 104 | 12 | false | 9 | (1 ceramidse) (2 monoAGcholinPctf) (1 PI45diase) (1 PI4kin) (1 PI4P5kin) (2 PLA2) (-1 PLC) (-2 PLD) (1 Sphmydias) | 2 PA + PI + Sphmy = 2 AA + PC + 3 fatak + inositolTP + sph                     |
| 105 | 6  | false | 6 | (1 ceramidse) (-1 ERMfform) (-1 ERMform) (1 PI45diase) (-1 PLC) (1 Sphmydias)                                     | ERM-PIP2 + Sphmy = Ezrin + PC + TM + fatak + inositolTP + sph                  |
| 106 | 14 | false | 7 | (3 ceramidse) (-2 DAGkin) (1 PI45diase) (1 PI4kin) (1 PI4P5kin) (-3 PLC) (3 Sphmydias)                            | 2 DAG-3P + PI + 3 Sphmy = 3 PC + 3 fatak + inositolTP + 3 sph                  |
| 107 | 14 | false | 8 | (3 ceramidse) (-2 Cholinkin) (1 PI45diase) (1 PI4kin) (1 PI4P5kin) (-1 PLC) (-2 PLD) (3 Sphmydias)                | 2 PA + PI + 3 Sphmy = 3 PC + 3 fatak + inositolTP + 3 sph                      |
| 108 | 12 | false | 8 | (2 ceramidse) (-2 Cholinkin) (-1 PAP) (1 PI45diase) (1 PI4kin) (1 PI4P5kin) (-2 PLD) (2 Sphmydias)                | P + PA + PI + 2 Sphmy = 2 PC + 2 fatak + inositolTP + 2 sph                    |
| 109 | 12 | false | 8 | (2 ceramidse) (-2 Cholinkin) (-1 Lipase) (1 PI45diase) (1 PI4kin) (1 PI4P5kin) (-2 PLD) (2 Sphmydias)             | 2 PA + PI + 2 Sphmy = 2 PC + TAG + fatak + inositolTP + 2 sph                  |
| 110 | 16 | false | 8 | (3 ceramidse) (-3 Cholinkin) (1 DAGkin) (1 PI45diase) (1 PI4kin) (1 PI4P5kin) (-3 PLD) (3 Sphmydias)              | 3 PA + PI + 3 Sphmy = DAG-3P + 3 PC + 3 fatak + inositolTP + 3 sph             |

small phagosome EMs

|     |    |       |   |                                                                                                         |                                                                              |
|-----|----|-------|---|---------------------------------------------------------------------------------------------------------|------------------------------------------------------------------------------|
| 111 | 8  | false | 8 | (1 ceramidse) (-1 Cholinkin) (1 DAGkin) (-1 ERMfform) (-1 ERMform) (1 PI45diase) (1 PLD) (1 Sphmydias)  | ERM-PIP2 + PA + Sphmy = DAG-3P + Ezrin + PC + TM + fatac + inositolTP + sph  |
| 112 | 12 | false | 8 | (2 ceramidse) (-2 Cholinkin) (-1 DAGcholT) (1 PI45diase) (1 PI4kin) (1 PI4P5kin) (-2 PLD) (2 Sphmydias) | CDP-cholin + 2 PA + PI + 2 Sphmy = CMP + 3 PC + 2 fatac + inositolTP + 2 sph |
| 113 | 2  | false | 2 | (1 CDPinotra) (1 CDPsynth)                                                                              | CTP + PA + inositol = CMP + PI + PPi                                         |
| 114 | 2  | false | 2 | (1 Actinnucl) (-1 SPK)                                                                                  | 2 Actin + S-1-P = Actinpoly + P + sph                                        |
| 115 | 4  | false | 4 | (1 Actinnucl) (1 monoAGcholinPCtf) (1 PLA2) (-1 PLD)                                                    | 2 Actin + PA = AA + Actinpoly + P + fatac                                    |
| 116 | 6  | false | 5 | (2 Actinnucl) (-1 ERMfform) (-1 ERMform) (-1 PI4kin) (-1 PI4P5kin)                                      | 4 Actin + ERM-PIP2 = 2 Actinpoly + Ezrin + 2 P + PI + TM                     |
| 117 | 3  | false | 3 | (1 Actinnucl) (-1 DAGkin) (-1 PAP)                                                                      | 2 Actin + DAG-3P = Actinpoly + PA                                            |
| 118 | 3  | false | 3 | (1 Actinnucl) (-1 DAGkin) (-1 Lipase)                                                                   | 2 Actin + DAG-3P + fatac = Actinpoly + P + TAG                               |
| 119 | 3  | false | 3 | (1 Actinnucl) (-1 DAGcholT) (-1 DAGkin)                                                                 | 2 Actin + CDP-cholin + DAG-3P = Actinpoly + CMP + P + PC                     |
| 120 | 4  | false | 4 | (1 Actinnucl) (-1 CholinPtf) (-1 DAGkin) (-1 PLC)                                                       | 2 Actin + CDP-cholin + DAG-3P + PPi = Actinpoly + CTP + P + PC               |
| 121 | 5  | false | 5 | (1 Actinnucl) (-1 Cholinkin) (-1 PAP) (1 PLC) (-1 PLD)                                                  | 2 Actin = Actinpoly                                                          |
| 122 | 5  | false | 5 | (1 Actinnucl) (-1 Cholinkin) (-1 Lipase) (1 PLC) (-1 PLD)                                               | 2 Actin + PA + fatac = Actinpoly + P + TAG                                   |
| 123 | 6  | false | 6 | (1 Actinnucl) (1 Cholinkin) (-1 DAGkin) (1 monoAGcholinPCtf) (1 PLA2) (-1 PLC)                          | 2 Actin + DAG-3P = AA + Actinpoly + P + fatac                                |
| 124 | 5  | false | 5 | (1 Actinnucl) (-1 Cholinkin) (-1 DAGcholT) (1 PLC) (-1 PLD)                                             | 2 Actin + CDP-cholin + PA = Actinpoly + CMP + P + PC                         |
| 125 | 4  | false | 4 | (1 Actinnucl) (-1 Cholinkin) (-1 CholinPtf) (-1 PLD)                                                    | 2 Actin + CDP-cholin + PA + PPi = Actinpoly + CTP + P + PC                   |
| 126 | 5  | false | 5 | (1 Actinnucl) (1 ceramidse) (-1 DAGkin) (-1 PLC) (1 Sphmydias)                                          | 2 Actin + DAG-3P + Sphmy = Actinpoly + P + PC + fatac + sph                  |
| 127 | 5  | false | 5 | (1 Actinnucl) (1 ceramidse) (-1 Cholinkin) (-1 PLD) (1 Sphmydias)                                       | 2 Actin + PA + Sphmy = Actinpoly + P + PC + fatac + sph                      |
| 128 | 1  | false | 1 | (1 Actindepoly)                                                                                         | Actinpoly = 2 Actin                                                          |

<sup>1</sup> The actin nucleation modes are listed from mode 114 onwards. Only these phospholipids did also stimulate actin nucleation in experiments with phagosomes.



**Table 4: Extended phagosome network - metabolites**

| <b>Name</b>                    | <b>internal?</b> | <b>Connectivity</b> | <b>Description</b>                       |
|--------------------------------|------------------|---------------------|------------------------------------------|
| 1-Acyl-sn-glycero-3-Pcholine   | true             | 3                   | 1-Acyl-sn-glycero-3-phosphocholine       |
| 1-Acyl-sn-glycero-3-PEtOHamine | true             | 2                   | 1-Acyl-sn-glycero-3-phosphoethanolamine  |
| 1-Acyl-sn-glycerol3-P          | false            | 2                   | 1-Acyl-sn-glycerol 3-phosphate           |
| 1,2-Diacyl-sn-glycerol         | true             | 4                   | 1,2-Diacyl-sn-glycerol                   |
| 2-Acyl-sn-glycero-3-Pcholine   | false            | 1                   | 2-Acyl-sn-glycero-3-phosphocholine       |
| 2-Acyl-sn-glycero-3-PEtOHamine | false            | 1                   | 2-Acyl-sn-glycero-3-phosphoethanolamine  |
| 2-Acyl-sn-glycerol3-P          | false            | 1                   | 2-Acyl-sn-glycerol 3-phosphate           |
| Ac                             | false            | 1                   | Acetate                                  |
| Ac-CoA                         | false            | 1                   | Acetyl-CoA                               |
| Accholine                      | true             | 2                   | Acetylcholine                            |
| Acyl-CoA                       | false            | 4                   | Acyl-CoA                                 |
| AcylDHAP                       | false            | 1                   | Acylglycerone phosphate                  |
| Adenosyl-L-homoCys             | false            | 1                   | S-Adenosyl-L-homocysteine                |
| Adenosyl-L-Met                 | false            | 1                   | S-Adenosyl-L-methionine                  |
| Cardiolipin                    | false            | 2                   | Cardiolipin                              |
| CDP-choline                    | false            | 2                   | CDP-choline                              |
| CDP-diacylglycerol             | true             | 3                   | CDP-diacylglycerol                       |
| CDP-EtOHamine                  | false            | 1                   | CDP-ethanolamine                         |
| Choline                        | true             | 6                   | Choline                                  |
| CholineP                       | true             | 3                   | Choline phosphate                        |
| CMP                            | false            | 3                   | CMP                                      |
| CoA                            | false            | 5                   | CoA                                      |
| CTP                            | false            | 3                   | CTP                                      |
| D-Glucuronate                  | false            | 1                   | D-Glucuronate                            |
| DHAP                           | true             | 3                   | Glycerone phosphate                      |
| EtOHamine                      | true             | 4                   | Ethanolamine                             |
| EtOHamineP                     | true             | 3                   | Ethanolamine phosphate                   |
| FAD                            | false            | 1                   | FAD                                      |
| FADH2                          | false            | 1                   | FADH2                                    |
| Fattyacid                      | false            | 6                   | Fatty acid                               |
| G6P                            | false            | 1                   | D-Glucose 6-phosphate                    |
| Glycerol                       | false            | 1                   | Glycerol                                 |
| inositol                       | true             | 5                   | myo-Inositol                             |
| inositol_TEP_1345              | true             | 3                   | D-myo-Inositol 1,3,4,5-tetrakisphosphate |
| inositolBP_14                  | true             | 2                   | D-myo-Inositol 1,4-bisphosphate          |
| inositolBP_34                  | true             | 2                   | D-myo-Inositol 3,4-bisphosphate          |
| inositolHP                     | false            | 1                   | myo-Inositol hexakisphosphate            |

large phagosome metabolites

|                                |       |   |                                                |
|--------------------------------|-------|---|------------------------------------------------|
| inositolP_1                    | true  | 2 | Inositol 1-phosphate                           |
| inositolP_3                    | true  | 2 | D-myo-Inositol 3-phosphate                     |
| inositolP_4                    | true  | 2 | myo-Inositol 4-phosphate                       |
| inositolPP_13456               | true  | 2 | D-myo-Inositol 1,3,4,5,6-pentakisphosphate     |
| inositolTEP_1456               | true  | 2 | D-myo-Inositol 1,4,5,6-tetrakisphosphate       |
| inositolTP_134                 | true  | 2 | D-myo-Inositol 1,3,4-trisphosphate             |
| inositolTP_145                 | true  | 5 | D-myo-Inositol 1,4,5-trisphosphate             |
| L-Ser                          | false | 2 | L-Serine                                       |
| NAD+                           | false | 1 | NAD+                                           |
| NADH                           | false | 1 | NADH                                           |
| Oxygen                         | false | 1 | Oxygen                                         |
| PA                             | true  | 6 | Phosphatidate                                  |
| PC                             | true  | 5 | Phosphatidylcholine                            |
| Phosphatidyl-N-methylEtOHamine | false | 1 | Phosphatidyl-N-methylethanolamine              |
| PhosphatidylEtOHamine          | true  | 5 | Phosphatidylethanolamine                       |
| Phosphatidylglycerol           | false | 2 | Phosphatidylglycerol                           |
| PI                             | false | 3 | 1-Phosphatidyl-D-myo-inositol                  |
| PIP2_45                        | true  | 5 | 1-Phosphatidyl-D-myo-inositol 4,5-bisphosphate |
| PIP3_345                       | true  | 2 | Phosphatidylinositol-3,4,5-trisphosphate       |
| PIP_3                          | false | 1 | 1-Phosphatidyl-1D-myo-inositol 3-phosphate     |
| PIP_4                          | true  | 3 | 1-Phosphatidyl-1D-myo-inositol 4-phosphate     |
| PSer                           | true  | 3 | Phosphatidylserine                             |
| sn-glycero-3-Pcholine          | false | 2 | sn-glycero-3-Phosphocholine                    |
| sn-glycero-3-PEtOHamine        | false | 2 | sn-glycero-3-Phosphoethanolamine               |
| sn-Glycerol3-P                 | true  | 4 | sn-Glycerol 3-phosphate                        |
| Sterol                         | false | 1 | Sterol                                         |
| Sterylester                    | false | 1 | Steryl ester                                   |

**Table 5: Extended phagosome network - reactions**

| Enzyme name | rev.? | Reaction equation                                                                            | Annotation                                                                      |
|-------------|-------|----------------------------------------------------------------------------------------------|---------------------------------------------------------------------------------|
| rn:R00840   | true  | inositolP_1 = G6P                                                                            | 1L-myo-Inositol-1-phosphate lyase (isomerizing) [5.5.1.4]                       |
| rn:R00842   | false | NAD+ + sn-Glycerol3-P = DHAP + NADH                                                          | sn-Glycerol-3-phosphate:NAD+ 2-oxidoreductase [1.1.1.8 , 1.1.1.94]              |
| rn:R00848   | false | FAD + sn-Glycerol3-P = DHAP + FADH2                                                          | sn-Glycerol-3-phosphate:(acceptor) 2-oxidoreductase [1.1.99.5]                  |
| rn:R00851   | false | Acyl-CoA + sn-Glycerol3-P = 1-Acyl-sn-glycerol3-P + CoA                                      | acyl-CoA:sn-glycerol-3-phosphate 1-O-acyltransferase [2.3.1.15]                 |
| rn:R01013   | true  | Acyl-CoA + DHAP = AcylDHAP + CoA                                                             | Acyl-CoA:glycerone-phosphate O-acyltransferase [2.3.1.42]                       |
| rn:R01021   | false | Choline = CholineP                                                                           | ATP:choline phosphotransferase [2.7.1.32]                                       |
| rn:R01023   | false | Ac-CoA + Choline = Accholine + CoA                                                           | Acetyl-CoA:choline O-acetyltransferase [2.3.1.6]                                |
| rn:R01026   | false | Accholine = Ac + Choline                                                                     | Acetylcholine aetylhydrolase [3.1.1.7]                                          |
| rn:R01184   | false | Oxygen + inositol = D-Glucuronate                                                            | myo-Inositol:oxygen oxidoreductase [1.13.99.1]                                  |
| rn:R01185   | false | inositolP_1 = inositol                                                                       | myo-Inositol 1-phosphate phosphahydrolase [3.1.3.25]                            |
| rn:R01186   | false | inositolP_4 = inositol                                                                       | myo-Inositol 4-phosphate phosphahydrolase [3.1.3.25]                            |
| rn:R01187   | false | inositolP_3 = inositol                                                                       | 1D-myo-Inositol 3-phosphate phosphahydrolase [3.1.3.25]                         |
| rn:R01310   | false | PC = Choline + PA                                                                            | Phosphatidylcholine phosphatidohydrolase [3.1.4.4]                              |
| rn:R01315   | false | PC = 1-Acyl-sn-glycero-3-Pcholine + Fattyacid                                                | Phosphatidylcholine 2-acylhylolase [3.1.1.4]                                    |
| rn:R01321   | false | 12-Diacyl-sn-glycerol + CDP-choline = CMP + PC                                               | CDPcholine:1,2-diacylglycerol cholinephosphotransferase [2.7.8.2]               |
| rn:R01468   | false | EtOHamine = EtOHamineP                                                                       | ATP:ethanolamine O-phosphotransferase [2.7.1.82]                                |
| rn:R01799   | false | CTP + PA = CDP-diacylglycerol                                                                | CTP:phosphatidate cytidyltransferase [2.7.7.41]                                 |
| rn:R01802   | false | CDP-diacylglycerol + inositol = CMP + PI                                                     | CDPdiacylglycerol:myo-inositol 3-phosphatidyltransferase [2.7.8.11]             |
| rn:R01890   | false | CTP + CholineP = CDP-choline                                                                 | CTP:choline-phosphate cytidyltransferase [2.7.7.15]                             |
| rn:R02030   | false | CDP-diacylglycerol + Phosphatidylglycerol = CMP + Cardiolipin                                | [2.7.8.-]                                                                       |
| rn:R02038   | false | CTP + EtOHamineP = CDP-EtOHamine                                                             | CTP:ethanolamine-phosphate cytidyltransferase [2.7.7.14]                        |
| rn:R02051   | false | PhosphatidylEtOHamine = EtOHamine + PA                                                       | Phosphatidylethanolamine phosphatidohydrolase [3.1.4.4]                         |
| rn:R02053   | false | PhosphatidylEtOHamine = 1-Acyl-sn-glycero-3-PEtOHamine + Fattyacid                           | Phosphatidylethanolamine 2-acylhylolase [3.1.1.4]                               |
| rn:R02055   | false | PSer = PhosphatidylEtOHamine                                                                 | Phosphatidyl-L-serine carboxy-lyase [4.1.1.65]                                  |
| rn:R02056   | false | Adenosyl-L-Met + PhosphatidylEtOHamine = Adenosyl-L-homoCys + Phosphatidyl-N-methylEtOHamine | S-Adenosyl-L-methionine:phosphatidylethanolamine N-methyltransferase [2.1.1.17] |
| rn:R02114   | false | PC + Sterol = 1-Acyl-sn-glycero-3-Pcholine + Sterylester                                     | Phosphatidylcholine:sterol O-acyltransferase [2.3.1.43]                         |
| rn:R02239   | false | PA = 12-Diacyl-sn-glycerol                                                                   | 1,2-Diacyl-sn-glycerol 3-phosphate phosphohydrolase [3.1.3.4]                   |
| rn:R02240   | false | 12-Diacyl-sn-glycerol = PA                                                                   | ATP:1,2-diacylglycerol 3-phosphotransferase [2.7.1.107]                         |
| rn:R02241   | false | CoA + PA = 1-Acyl-sn-glycerol3-P + Acyl-CoA                                                  | [2.3.1.51]                                                                      |

large phagosome reactions

|           |       |                                                                         |                                                                                         |
|-----------|-------|-------------------------------------------------------------------------|-----------------------------------------------------------------------------------------|
| rn:R02746 | false | 1-Acyl-sn-glycero-3-Pcholine = Fattyacid + sn-glycero-3-Pcholine        | 1-Acyl-sn-glycero-3-phosphocholine acylhydrolase [3.1.1.5]                              |
| rn:R02747 | false | 2-Acyl-sn-glycero-3-Pcholine = Fattyacid + sn-glycero-3-Pcholine        | 2-Acyl-sn-glycero-3-phosphocholine acylhydrolase [3.1.1.5]                              |
| rn:R03361 | false | PI = PIP <sub>4</sub>                                                   | ATP:1-Phosphatidyl-1D-myo-inositol 4-phosphotransferase [2.7.1.67]                      |
| rn:R03362 | false | PI = PIP <sub>3</sub>                                                   | ATP:1-phosphatidyl-1D-myo-inositol 3-phosphotransferase [2.7.1.137]                     |
| rn:R03393 | false | inositolBP <sub>14</sub> = inositolP <sub>4</sub>                       | D-myo-Inositol-1,4-bisphosphate 1-phosphohydrolase [3.1.3.57]                           |
| rn:R03394 | false | inositolTP <sub>145</sub> = inositolBP <sub>14</sub>                    | D-myo-Inositol-1,4,5-trisphosphate 5-phosphohydrolase [3.1.3.56]                        |
| rn:R03416 | false | 1-Acyl-sn-glycero-3-PEtOHamine = Fattyacid + sn-glycero-3-PEtOHamine    | 1-Acyl-sn-glycero-3-phosphoethanolamine aldehydohydrolase [3.1.1.5]                     |
| rn:R03417 | false | 2-Acyl-sn-glycero-3-PEtOHamine = Fattyacid + sn-glycero-3-PEtOHamine    | L-2-Lysophosphatidylethanolamine aldehydohydrolase [3.1.1.5]                            |
| rn:R03427 | false | inositolTP <sub>134</sub> = inositolBP <sub>34</sub>                    | D-myo-Inositol 1,3,4-trisphosphate 1-phosphohydrolase [3.1.3.57]                        |
| rn:R03430 | false | inositol_TEP <sub>1345</sub> = inositolTP <sub>134</sub>                | D-myo-Inositol 1,3,4,5-tetrakisphosphate 5-phosphohydrolase [3.1.3.56]                  |
| rn:R03433 | false | inositolTP <sub>145</sub> = inositol_TEP <sub>1345</sub>                | ATP:1D-myo-inositol-1,4,5-trisphosphate 3-phosphotransferase [2.7.1.127]                |
| rn:R03434 | false | inositol_TEP <sub>1345</sub> = inositolTP <sub>145</sub>                | D-myo-Inositol 1,3,4,5-tetrakisphosphate 3-phosphohydrolase [3.1.3.62]                  |
| rn:R03435 | false | PIP <sub>2_45</sub> = 12-Diacyl-sn-glycerol + inositolTP <sub>145</sub> | 1-Phosphatidyl-1D-myo-inositol-4,5-bisphosphate inositoltrisphosphohydrolase [3.1.4.11] |
| rn:R03469 | false | PIP <sub>4</sub> = PIP <sub>2_45</sub>                                  | ATP:1-phosphatidyl-1D-myo-inositol-4-phosphate 5-phosphotransferase [2.7.1.68]          |
| rn:R04372 | false | inositolBP <sub>34</sub> = inositolP <sub>3</sub>                       | D-myo-Inositol-3,4-bisphosphate 4-phosphohydrolase [3.1.3.66]                           |
| rn:R04404 | false | PIP <sub>2_45</sub> = PIP <sub>4</sub>                                  | Phosphatidyl-myo-inositol-4,5-bisphosphate 4-phosphohydrolase [3.1.3.36]                |
| rn:R04513 | false | PIP <sub>3_345</sub> = PIP <sub>2_45</sub>                              | Phosphatidylinositol-3,4,5-trisphosphate 3-phosphohydrolase [3.1.3.67]                  |
| rn:R04545 | false | PIP <sub>2_45</sub> = PIP <sub>3_345</sub>                              | ATP:1-phosphatidyl-1D-myo-inositol-4,5-bisphosphate 3-phosphotransferase [2.7.1.153]    |
| rn:R05202 | true  | inositolHP = inositolPP <sub>13456</sub>                                | unknown [2.7.1.-]                                                                       |
| rn:R05800 | false | inositolTP <sub>145</sub> = inositolTEP <sub>1456</sub>                 | ATP:1D-myo-inositol-1,4,5-trisphosphate 6-phosphotransferase [2.7.1.151]                |
| rn:R05801 | false | inositolTEP <sub>1456</sub> = inositolPP <sub>13456</sub>               | ATP:1D-myo-inositol-1,4,5-trisphosphate 6-phosphotransferase [2.7.1.151]                |
| rn:R06870 | false | EtOHamineP = EtOHamine                                                  | Phosphoethanolamine phosphohydrolase [3.1.3.75]                                         |
| rn:R06871 | false | CholineP = Choline                                                      | Phosphocholine phosphohydrolase [3.1.3.75]                                              |

large phagosome reactions

|           |       |                                                         |                                                         |
|-----------|-------|---------------------------------------------------------|---------------------------------------------------------|
| rn:R06872 | true  | Acyl-CoA + sn-Glycerol3-P = 2-Acyl-sn-glycerol3-P + CoA | Acyl-CoA:sn-glycerol-3-phosphate 2-O-acyltransferase [] |
| rn:R07376 | false | L-Ser + PhosphatidylEtOHamine = EtOHamine + PSer        | []                                                      |
| rn:R07377 | false | L-Ser + PC = Choline + PSer                             | []                                                      |
| rn:R07390 | false | 2 Phosphatidylglycerol = Cardiolipin + Glycerol         | [2.7.8.-]                                               |

**Table 6: Extended phagosome network - Elementary Modes**

| #  | Flux sum | Rev.? | Pathlength | Reactions                                                                                                                                                                               | Net reaction                                                                     |
|----|----------|-------|------------|-----------------------------------------------------------------------------------------------------------------------------------------------------------------------------------------|----------------------------------------------------------------------------------|
| 1  | 1        | false | 1          | (1 m:R03417)                                                                                                                                                                            | 2-Acyl-sn-glycero-3-PEtOHamine = Fattyacid + sn-glycero-3-PEtOHamine             |
| 2  | 1        | false | 1          | (1 m:R07390)                                                                                                                                                                            | 2 Phosphatidylglycerol = Cardiolipin + Glycerol                                  |
| 3  | 3        | false | 3          | (-1 m:R00840) (1 m:R01184) (1 m:R01185)                                                                                                                                                 | G6P + Oxygen = D-Glucuronate                                                     |
| 4  | 2        | false | 2          | (1 m:R00851) (-1 m:R06872)                                                                                                                                                              | 2-Acyl-sn-glycerol3-P = 1-Acyl-sn-glycerol3-P                                    |
| 5  | 2        | false | 2          | (1 m:R04513) (1 m:R04545)                                                                                                                                                               | no net reaction                                                                  |
| 6  | 3        | false | 3          | (1 m:R00848) (1 m:R01013) (-1 m:R06872)                                                                                                                                                 | 2-Acyl-sn-glycerol3-P + FAD = AcylDHAP + FADH2                                   |
| 7  | 3        | false | 3          | (1 m:R00842) (1 m:R01013) (-1 m:R06872)                                                                                                                                                 | 2-Acyl-sn-glycerol3-P + NAD+ = AcylDHAP + NADH                                   |
| 8  | 2        | false | 2          | (1 m:R01468) (1 m:R06870)                                                                                                                                                               | no net reaction                                                                  |
| 9  | 1        | false | 1          | (1 m:R03362)                                                                                                                                                                            | PI = PIP_3                                                                       |
| 10 | 1        | false | 1          | (1 m:R02747)                                                                                                                                                                            | 2-Acyl-sn-glycero-3-Pcholine = Fattyacid + sn-glycero-3-Pcholine                 |
| 11 | 2        | false | 2          | (1 m:R01021) (1 m:R06871)                                                                                                                                                               | no net reaction                                                                  |
| 12 | 4        | false | 4          | (1 m:R01468) (1 m:R02038) (1 m:R02055) (1 m:R07376)                                                                                                                                     | CTP + L-Ser = CDP-EtOHamine                                                      |
| 13 | 5        | false | 5          | (1 m:R01021) (1 m:R01310) (1 m:R01321) (1 m:R01890) (1 m:R02239)                                                                                                                        | CTP = CMP                                                                        |
| 14 | 2        | false | 2          | (1 m:R01023) (1 m:R01026)                                                                                                                                                               | Ac-CoA = Ac + CoA                                                                |
| 15 | 9        | false | 9          | (1 m:R01021) (1 m:R01321) (1 m:R01468) (1 m:R01890) (1 m:R02038) (1 m:R02051) (1 m:R02055) (1 m:R02239) (1 m:R07377)                                                                    | 2 CTP + L-Ser = CDP-EtOHamine + CMP                                              |
| 16 | 2        | false | 2          | (1 m:R03433) (1 m:R03434)                                                                                                                                                               | no net reaction                                                                  |
| 17 | 2        | false | 2          | (1 m:R02239) (1 m:R02240)                                                                                                                                                               | no net reaction                                                                  |
| 18 | 11       | false | 11         | (1 m:R01021) (1 m:R01310) (1 m:R01321) (1 m:R01890) (1 m:R02241) (1 m:R03361) (1 m:R03435) (1 m:R03469) (-1 m:R05202) (1 m:R05800) (1 m:R05801)                                         | CTP + CoA + PI = 1-Acyl-sn-glycerol3-P + Acyl-CoA + CMP + inositolHP             |
| 19 | 12       | false | 12         | (1 m:R01021) (1 m:R01310) (1 m:R01321) (1 m:R01799) (1 m:R01890) (1 m:R02030) (1 m:R03361) (1 m:R03435) (1 m:R03469) (-1 m:R05202) (1 m:R05800) (1 m:R05801)                            | 2 CTP + PI + Phosphatidylglycerol = 2 CMP + Cardiolipin + inositolHP             |
| 20 | 14       | false | 14         | (-1 m:R00840) (1 m:R01021) (1 m:R01185) (1 m:R01310) (1 m:R01321) (1 m:R01799) (1 m:R01802) (1 m:R01890) (1 m:R03361) (1 m:R03435) (1 m:R03469) (-1 m:R05202) (1 m:R05800) (1 m:R05801) | 2 CTP + G6P = 2 CMP + inositolHP                                                 |
| 21 | 14       | false | 14         | (1 m:R01021) (1 m:R01184) (1 m:R01187) (1 m:R01310) (1 m:R01321) (1 m:R01890) (1 m:R02241) (1 m:R03361) (1 m:R03427) (1 m:R03430) (1 m:R03433) (1 m:R03435) (1 m:R03469) (1 m:R04372)   | CTP + CoA + Oxygen + PI = 1-Acyl-sn-glycerol3-P + Acyl-CoA + CMP + D-Glucuronate |

large phagosome EMs

|    |    |       |    |                                                                                                                                                                                                                                                        |                                                                                                                        |
|----|----|-------|----|--------------------------------------------------------------------------------------------------------------------------------------------------------------------------------------------------------------------------------------------------------|------------------------------------------------------------------------------------------------------------------------|
| 22 | 15 | false | 15 | (1 m:R01021) (1 m:R01184) (1 m:R01187) (1 m:R01310) (1 m:R01321) (1 m:R01799) (1 m:R01890) (1 m:R02030) (1 m:R03361) (1 m:R03427) (1 m:R03430) (1 m:R03433) (1 m:R03435) (1 m:R03469) (1 m:R04372)                                                     | 2 CTP + Oxygen + PI + Phosphatidylglycerol = 2 CMP + Cardiolipin + D-Glucuronate                                       |
| 23 | 14 | false | 14 | (1 m:R01021) (1 m:R01187) (1 m:R01310) (1 m:R01321) (1 m:R01799) (1 m:R01802) (1 m:R01890) (1 m:R03361) (1 m:R03427) (1 m:R03430) (1 m:R03433) (1 m:R03435) (1 m:R03469) (1 m:R04372)                                                                  | 2 CTP = 2 CMP                                                                                                          |
| 24 | 12 | false | 12 | (1 m:R01021) (1 m:R01321) (1 m:R01890) (1 m:R02055) (1 m:R02056) (1 m:R03361) (1 m:R03435) (1 m:R03469) (-1 m:R05202) (1 m:R05800) (1 m:R05801) (1 m:R07377)                                                                                           | Adenosyl-L-Met + CTP + L-Ser + PI = Adenosyl-L-homoCys + CMP + Phosphatidyl-N-methylEtOHamine + inositolHP             |
| 25 | 15 | false | 15 | (1 m:R01021) (1 m:R01184) (1 m:R01187) (1 m:R01321) (1 m:R01890) (1 m:R02055) (1 m:R02056) (1 m:R03361) (1 m:R03427) (1 m:R03430) (1 m:R03433) (1 m:R03435) (1 m:R03469) (1 m:R04372) (1 m:R07377)                                                     | Adenosyl-L-Met + CTP + L-Ser + Oxygen + PI = Adenosyl-L-homoCys + CMP + D-Glucuronate + Phosphatidyl-N-methylEtOHamine |
| 26 | 2  | false | 2  | (1 m:R03469) (1 m:R04404)                                                                                                                                                                                                                              | no net reaction                                                                                                        |
| 27 | 15 | false | 15 | (1 m:R01021) (1 m:R01321) (1 m:R01468) (1 m:R01890) (1 m:R02038) (1 m:R02051) (1 m:R02055) (1 m:R02241) (1 m:R03361) (1 m:R03435) (1 m:R03469) (-1 m:R05202) (1 m:R05800) (1 m:R05801) (1 m:R07377)                                                    | 2 CTP + CoA + L-Ser + PI = 1-Acyl-sn-glycerol3-P + Acyl-CoA + CDP-EtOHamine + CMP + inositolHP                         |
| 28 | 16 | false | 16 | (1 m:R01021) (1 m:R01321) (1 m:R01468) (1 m:R01799) (1 m:R01890) (1 m:R02030) (1 m:R02038) (1 m:R02051) (1 m:R02055) (1 m:R03361) (1 m:R03435) (1 m:R03469) (-1 m:R05202) (1 m:R05800) (1 m:R05801) (1 m:R07377)                                       | 3 CTP + L-Ser + PI + Phosphatidylglycerol = CDP-EtOHamine + 2 CMP + Cardiolipin + inositolHP                           |
| 29 | 18 | false | 18 | (-1 m:R00840) (1 m:R01021) (1 m:R01185) (1 m:R01321) (1 m:R01468) (1 m:R01799) (1 m:R01802) (1 m:R01890) (1 m:R02038) (1 m:R02051) (1 m:R02055) (1 m:R03361) (1 m:R03435) (1 m:R03469) (-1 m:R05202) (1 m:R05800) (1 m:R05801) (1 m:R07377)            | 3 CTP + G6P + L-Ser = CDP-EtOHamine + 2 CMP + inositolHP                                                               |
| 30 | 18 | false | 18 | (1 m:R01021) (1 m:R01184) (1 m:R01187) (1 m:R01321) (1 m:R01468) (1 m:R01890) (1 m:R02038) (1 m:R02051) (1 m:R02055) (1 m:R02241) (1 m:R03361) (1 m:R03427) (1 m:R03430) (1 m:R03433) (1 m:R03435) (1 m:R03469) (1 m:R04372) (1 m:R07377)              | 2 CTP + CoA + L-Ser + Oxygen + PI = 1-Acyl-sn-glycerol3-P + Acyl-CoA + CDP-EtOHamine + CMP + D-Glucuronate             |
| 31 | 19 | false | 19 | (1 m:R01021) (1 m:R01184) (1 m:R01187) (1 m:R01321) (1 m:R01468) (1 m:R01799) (1 m:R01890) (1 m:R02030) (1 m:R02038) (1 m:R02051) (1 m:R02055) (1 m:R03361) (1 m:R03427) (1 m:R03430) (1 m:R03433) (1 m:R03435) (1 m:R03469) (1 m:R04372) (1 m:R07377) | 3 CTP + L-Ser + Oxygen + PI + Phosphatidylglycerol = CDP-EtOHamine + 2 CMP + Cardiolipin + D-Glucuronate               |

large phagosome EMs

|    |    |       |    |                                                                                                                                                                                                                                           |                                                                                                                        |
|----|----|-------|----|-------------------------------------------------------------------------------------------------------------------------------------------------------------------------------------------------------------------------------------------|------------------------------------------------------------------------------------------------------------------------|
| 32 | 18 | false | 18 | (1 m:R01021) (1 m:R01187) (1 m:R01321) (1 m:R01468) (1 m:R01799) (1 m:R01802) (1 m:R01890) (1 m:R02038) (1 m:R02051) (1 m:R02055) (1 m:R03361) (1 m:R03427) (1 m:R03430) (1 m:R03433) (1 m:R03435) (1 m:R03469) (1 m:R04372) (1 m:R07377) | 3 CTP + L-Ser = CDP-EtOHamine + 2 CMP                                                                                  |
| 33 | 13 | false | 13 | (1 m:R01021) (1 m:R01321) (1 m:R01890) (1 m:R02053) (1 m:R02055) (1 m:R03361) (1 m:R03416) (1 m:R03435) (1 m:R03469) (-1 m:R05202) (1 m:R05800) (1 m:R05801) (1 m:R07377)                                                                 | CTP + L-Ser + PI = CMP + 2 Fattyacid + inositolHP + sn-glycero-3-PEtOHamine                                            |
| 34 | 16 | false | 16 | (1 m:R01021) (1 m:R01184) (1 m:R01187) (1 m:R01321) (1 m:R01890) (1 m:R02053) (1 m:R02055) (1 m:R03361) (1 m:R03416) (1 m:R03427) (1 m:R03430) (1 m:R03433) (1 m:R03435) (1 m:R03469) (1 m:R04372) (1 m:R07377)                           | CTP + L-Ser + Oxygen + PI = CMP + D-Glucuronate + 2 Fattyacid + sn-glycero-3-PEtOHamine                                |
| 35 | 9  | false | 9  | (1 m:R01315) (1 m:R01321) (1 m:R02746) (1 m:R03361) (1 m:R03435) (1 m:R03469) (-1 m:R05202) (1 m:R05800) (1 m:R05801)                                                                                                                     | CDP-choline + PI = CMP + 2 Fattyacid + inositolHP + sn-glycero-3-Pcholine                                              |
| 36 | 12 | false | 12 | (1 m:R01184) (1 m:R01187) (1 m:R01315) (1 m:R01321) (1 m:R02746) (1 m:R03361) (1 m:R03427) (1 m:R03430) (1 m:R03433) (1 m:R03435) (1 m:R03469) (1 m:R04372)                                                                               | CDP-choline + Oxygen + PI = CMP + D-Glucuronate + 2 Fattyacid + sn-glycero-3-Pcholine                                  |
| 37 | 12 | false | 12 | (1 m:R01021) (1 m:R01184) (1 m:R01186) (1 m:R01310) (1 m:R01321) (1 m:R01890) (1 m:R02241) (1 m:R03361) (1 m:R03393) (1 m:R03394) (1 m:R03435) (1 m:R03469)                                                                               | CTP + CoA + Oxygen + PI = 1-Acyl-sn-glycerol3-P + Acyl-CoA + CMP + D-Glucuronate                                       |
| 38 | 13 | false | 13 | (1 m:R01021) (1 m:R01184) (1 m:R01186) (1 m:R01310) (1 m:R01321) (1 m:R01799) (1 m:R01890) (1 m:R02030) (1 m:R03361) (1 m:R03393) (1 m:R03394) (1 m:R03435) (1 m:R03469)                                                                  | 2 CTP + Oxygen + PI + Phosphatidylglycerol = 2 CMP + Cardiolipin + D-Glucuronate                                       |
| 39 | 12 | false | 12 | (1 m:R01021) (1 m:R01186) (1 m:R01310) (1 m:R01321) (1 m:R01799) (1 m:R01802) (1 m:R01890) (1 m:R03361) (1 m:R03393) (1 m:R03394) (1 m:R03435) (1 m:R03469)                                                                               | 2 CTP = 2 CMP                                                                                                          |
| 40 | 13 | false | 13 | (1 m:R01021) (1 m:R01184) (1 m:R01186) (1 m:R01321) (1 m:R01890) (1 m:R02055) (1 m:R02056) (1 m:R03361) (1 m:R03393) (1 m:R03394) (1 m:R03435) (1 m:R03469) (1 m:R07377)                                                                  | Adenosyl-L-Met + CTP + L-Ser + Oxygen + PI = Adenosyl-L-homoCys + CMP + D-Glucuronate + Phosphatidyl-N-methylEtOHamine |
| 41 | 16 | false | 16 | (1 m:R01021) (1 m:R01184) (1 m:R01186) (1 m:R01321) (1 m:R01468) (1 m:R01890) (1 m:R02038) (1 m:R02051) (1 m:R02055) (1 m:R02241) (1 m:R03361) (1 m:R03393) (1 m:R03394) (1 m:R03435) (1 m:R03469) (1 m:R07377)                           | 2 CTP + CoA + L-Ser + Oxygen + PI = 1-Acyl-sn-glycerol3-P + Acyl-CoA + CDP-EtOHamine + CMP + D-Glucuronate             |
| 42 | 17 | false | 17 | (1 m:R01021) (1 m:R01184) (1 m:R01186) (1 m:R01321) (1 m:R01468) (1 m:R01799) (1 m:R01890) (1 m:R02030) (1 m:R02038) (1 m:R02051) (1 m:R02055) (1 m:R03361) (1 m:R03393) (1 m:R03394) (1 m:R03435) (1 m:R03469) (1 m:R07377)              | 3 CTP + L-Ser + Oxygen + PI + Phosphatidylglycerol = CDP-EtOHamine + 2 CMP + Cardiolipin + D-Glucuronate               |



large phagosome EMs

|    |    |       |    |                                                                                                                                                                                                                 |                                                                                                |
|----|----|-------|----|-----------------------------------------------------------------------------------------------------------------------------------------------------------------------------------------------------------------|------------------------------------------------------------------------------------------------|
| 43 | 16 | false | 16 | (1 m:R01021) (1 m:R01186) (1 m:R01321) (1 m:R01468) (1 m:R01799) (1 m:R01802) (1 m:R01890) (1 m:R02038) (1 m:R02051) (1 m:R02055) (1 m:R03361) (1 m:R03393) (1 m:R03394) (1 m:R03435) (1 m:R03469) (1 m:R07377) | 3 CTP + L-Ser = CDP-EtOHamine + 2 CMP                                                          |
| 44 | 14 | false | 14 | (1 m:R01021) (1 m:R01184) (1 m:R01186) (1 m:R01321) (1 m:R01890) (1 m:R02053) (1 m:R02055) (1 m:R03361) (1 m:R03393) (1 m:R03394) (1 m:R03416) (1 m:R03435) (1 m:R03469) (1 m:R07377)                           | CTP + L-Ser + Oxygen + PI = CMP + D-Glucuronate + 2 Fattyacid + sn-glycero-3-PEtOHamine        |
| 45 | 10 | false | 10 | (1 m:R01184) (1 m:R01186) (1 m:R01315) (1 m:R01321) (1 m:R02746) (1 m:R03361) (1 m:R03393) (1 m:R03394) (1 m:R03435) (1 m:R03469)                                                                               | CDP-choline + Oxygen + PI = CMP + D-Glucuronate + 2 Fattyacid + sn-glycero-3-Pcholine          |
| 46 | 8  | false | 8  | (1 m:R02240) (1 m:R02241) (1 m:R03361) (1 m:R03435) (1 m:R03469) (-1 m:R05202) (1 m:R05800) (1 m:R05801)                                                                                                        | CoA + PI = 1-Acyl-sn-glycerol3-P + Acyl-CoA + inositolHP                                       |
| 47 | 9  | false | 9  | (1 m:R01799) (1 m:R02030) (1 m:R02240) (1 m:R03361) (1 m:R03435) (1 m:R03469) (-1 m:R05202) (1 m:R05800) (1 m:R05801)                                                                                           | CTP + PI + Phosphatidylglycerol = CMP + Cardiolipin + inositolHP                               |
| 48 | 11 | false | 11 | (-1 m:R00840) (1 m:R01185) (1 m:R01799) (1 m:R01802) (1 m:R02240) (1 m:R03361) (1 m:R03435) (1 m:R03469) (-1 m:R05202) (1 m:R05800) (1 m:R05801)                                                                | CTP + G6P = CMP + inositolHP                                                                   |
| 49 | 11 | false | 11 | (1 m:R01184) (1 m:R01187) (1 m:R02240) (1 m:R02241) (1 m:R03361) (1 m:R03427) (1 m:R03430) (1 m:R03433) (1 m:R03435) (1 m:R03469) (1 m:R04372)                                                                  | CoA + Oxygen + PI = 1-Acyl-sn-glycerol3-P + Acyl-CoA + D-Glucuronate                           |
| 50 | 12 | false | 12 | (1 m:R01184) (1 m:R01187) (1 m:R01799) (1 m:R02030) (1 m:R02240) (1 m:R03361) (1 m:R03427) (1 m:R03430) (1 m:R03433) (1 m:R03435) (1 m:R03469) (1 m:R04372)                                                     | CTP + Oxygen + PI + Phosphatidylglycerol = CMP + Cardiolipin + D-Glucuronate                   |
| 51 | 11 | false | 11 | (1 m:R01187) (1 m:R01799) (1 m:R01802) (1 m:R02240) (1 m:R03361) (1 m:R03427) (1 m:R03430) (1 m:R03433) (1 m:R03435) (1 m:R03469) (1 m:R04372)                                                                  | CTP = CMP                                                                                      |
| 52 | 9  | false | 9  | (1 m:R01184) (1 m:R01186) (1 m:R02240) (1 m:R02241) (1 m:R03361) (1 m:R03393) (1 m:R03394) (1 m:R03435) (1 m:R03469)                                                                                            | CoA + Oxygen + PI = 1-Acyl-sn-glycerol3-P + Acyl-CoA + D-Glucuronate                           |
| 53 | 10 | false | 10 | (1 m:R01184) (1 m:R01186) (1 m:R01799) (1 m:R02030) (1 m:R02240) (1 m:R03361) (1 m:R03393) (1 m:R03394) (1 m:R03435) (1 m:R03469)                                                                               | CTP + Oxygen + PI + Phosphatidylglycerol = CMP + Cardiolipin + D-Glucuronate                   |
| 54 | 9  | false | 9  | (1 m:R01186) (1 m:R01799) (1 m:R01802) (1 m:R02240) (1 m:R03361) (1 m:R03393) (1 m:R03394) (1 m:R03435) (1 m:R03469)                                                                                            | CTP = CMP                                                                                      |
| 55 | 9  | false | 9  | (1 m:R01321) (1 m:R02114) (1 m:R02746) (1 m:R03361) (1 m:R03435) (1 m:R03469) (-1 m:R05202) (1 m:R05800) (1 m:R05801)                                                                                           | CDP-choline + PI + Sterol = CMP + Fattyacid + Sterylester + inositolHP + sn-glycero-3-Pcholine |

large phagosome EMs

|    |    |       |    |                                                                                                                                                             |                                                                                                            |
|----|----|-------|----|-------------------------------------------------------------------------------------------------------------------------------------------------------------|------------------------------------------------------------------------------------------------------------|
| 56 | 12 | false | 12 | (1 m:R01184) (1 m:R01187) (1 m:R01321) (1 m:R02114) (1 m:R02746) (1 m:R03361) (1 m:R03427) (1 m:R03430) (1 m:R03433) (1 m:R03435) (1 m:R03469) (1 m:R04372) | CDP-choline + Oxygen + PI + Sterol = CMP + D-Glucuronate + Fattyacid + Sterylester + sn-glycero-3-Pcholine |
| 57 | 10 | false | 10 | (1 m:R01184) (1 m:R01186) (1 m:R01321) (1 m:R02114) (1 m:R02746) (1 m:R03361) (1 m:R03393) (1 m:R03394) (1 m:R03435) (1 m:R03469)                           | CDP-choline + Oxygen + PI + Sterol = CMP + D-Glucuronate + Fattyacid + Sterylester + sn-glycero-3-Pcholine |

**Table 7: *S. saprophyticus* network - metabolites**

| <b>Name</b>                               | <b>internal?</b> | <b>Connectivity</b> | <b>Description</b>                                      |
|-------------------------------------------|------------------|---------------------|---------------------------------------------------------|
| (5-P-D-R)anthranilate                     | true             | 2                   | N-(5-Phospho-D-ribosyl)anthranilate                     |
| 1-(2-Carboxyphenylamino)-1-deoxy-D-Ru_5-P | true             | 2                   | 1-(2-Carboxyphenylamino)-1-deoxy-D-ribulose_5-phosphate |
| 2-(A-Hydroxyethyl)thiamine_diP            | true             | 3                   | 2-(alpha-Hydroxyethyl)thiamine_diphosphate              |
| 2-Oxobutanoate                            | true             | 2                   | 2-Oxobutanoate                                          |
| 2-P-D-GA                                  | true             | 2                   | 2-Phospho-D-glycerate                                   |
| 23-Dihydrodipicolinate                    | true             | 2                   | 2,3-Dihydrodipicolinate                                 |
| 2345-Tetrahydrodipicolinate               | true             | 2                   | 2,3,4,5-Tetrahydrodipicolinate                          |
| 3-(4-Hydroxyphenyl)PYR                    | true             | 2                   | 3-(4-Hydroxyphenyl)pyruvate                             |
| 3-(Imidazol-4-yl)-2-oxopropyl_P           | true             | 2                   | 3-(Imidazol-4-yl)-2-oxopropyl_phosphate                 |
| 3-DehydroShi                              | true             | 2                   | 3-Dehydroshikimate                                      |
| 3-Methyl-2-oxobutanoate                   | true             | 3                   | 3-Methyl-2-oxobutanoate                                 |
| 3-P-D-GA                                  | true             | 2                   | 3-Phospho-D-glycerate                                   |
| 3-P-D-glyceroyl_P                         | true             | 2                   | 3-Phospho-D-glyceroyl_phosphate                         |
| 4-Imidazolone-5-propanoate                | true             | 3                   | 4-Imidazolone-5-propanoate                              |
| 4-P-L-Asp                                 | true             | 2                   | 4-Phospho-L-aspartate                                   |
| 5-O-(1-Carboxyvinyl)-3-PShi               | true             | 2                   | 5-O-(1-Carboxyvinyl)-3-phosphoshikimate                 |
| 510-MethyleneTHF                          | true             | 2                   | 5,10-Methylenetetrahydrofolate                          |
| 6PGlucon                                  | true             | 2                   | 6-Phospho-D-gluconate                                   |
| Ac                                        | true             | 4                   | Acetate                                                 |
| Ac-CoA                                    | true             | 6                   | Acetyl-CoA                                              |
| Acetaldehyde                              | true             | 1                   | Acetaldehyde                                            |
| AICAR                                     | true             | 2                   | 1-(5-Phosphoribosyl)-5-amino-4-imidazolecarboxamide     |
| AKG                                       | true             | 14                  | 2-Oxoglutarate                                          |
| Ala-tRNA(ex)                              | false            | 1                   | Ala-tRNA(ex)                                            |
| Anthranilate                              | true             | 2                   | Anthranilate                                            |
| Arg-tRNA(ex)                              | false            | 1                   | Arg-tRNA(ex)                                            |
| Asn-tRNA(ex)                              | false            | 1                   | Asn-tRNA(ex)                                            |
| Asp-tRNA(ex)                              | false            | 1                   | Asp-tRNA(ex)                                            |
| Carbamoyl_P                               | true             | 2                   | Carbamoyl_phosphate                                     |
| Chor                                      | true             | 3                   | Chorismate                                              |
| cis-Acon                                  | true             | 2                   | cis-Aconitate                                           |
| Cit                                       | true             | 2                   | Citrate                                                 |
| CoA                                       | true             | 9                   | CoA                                                     |
| Cys-tRNA(ex)                              | false            | 1                   | Cys-tRNA(ex)                                            |
| D-Ala                                     | true             | 2                   | D-Alanine                                               |
| D-E4P                                     | true             | 3                   | D-Erythrose_4-phosphate                                 |
| D-erythro-1-(Imidazol-4-yl)glycerol_3-P   | true             | 2                   | D-erythro-1-(Imidazol-4-yl)glycerol_3-phosphate         |

## SAP metabolites

|                          |       |    |                                                   |
|--------------------------|-------|----|---------------------------------------------------|
| D-F                      | true  | 2  | D-Fructose                                        |
| D-F_16-BP                | true  | 3  | D-Fructose_1,6-bisphosphate                       |
| D-F_6-P                  | true  | 6  | D-Fructose_6-phosphate                            |
| D-G(ex)                  | false | 1  | D-Glucose(ex)                                     |
| D-G_6-P                  | true  | 4  | D-Glucose_6-phosphate                             |
| D-Glu                    | true  | 2  | D-Glutamate                                       |
| D-Glucono-15-lactone_6-P | true  | 2  | D-Glucono-1,5-lactone_6-phosphate                 |
| D-Ri_5-P                 | true  | 3  | D-Ribose_5-phosphate                              |
| D-Ru_5-P                 | true  | 3  | D-Ribulose_5-phosphate                            |
| D-S7P                    | true  | 2  | D-Sedoheptulose_7-phosphate                       |
| D-Xu_5-P                 | true  | 3  | D-Xylulose_5-phosphate                            |
| DAHP                     | true  | 2  | 2-Dehydro-3-deoxy-D-arabino-heptonate_7-phosphate |
| DHQ                      | true  | 2  | 3-Dehydroquinate                                  |
| FAD                      | false | 1  | FAD                                               |
| FADH2                    | false | 1  | FADH2                                             |
| Formamide                | true  | 1  | Formamide                                         |
| Formimino-L-Glu          | true  | 2  | N-Formimino-L-glutamate                           |
| Fum                      | true  | 3  | Fumarate                                          |
| GA_P                     | true  | 7  | (2R)-2-Hydroxy-3-(phosphonoxy)-propanal           |
| Gln-tRNA(ex)             | false | 1  | Gln-tRNA(ex)                                      |
| Glu-tRNA(ex)             | false | 1  | Glu-tRNA(ex)                                      |
| Gly                      | true  | 3  | Glycine                                           |
| Gly-tRNA(ex)             | false | 1  | Gly-tRNA(ex)                                      |
| Glycerone_P              | true  | 2  | Glycerone_phosphate                               |
| His-tRNA(ex)             | false | 1  | His-tRNA(ex)                                      |
| Ile-tRNA(ex)             | false | 1  | Ile-tRNA(ex)                                      |
| Indoleglycerol_P         | true  | 2  | Indoleglycerol_phosphate                          |
| IsoCit                   | true  | 2  | Isocitrate                                        |
| L-Ala                    | true  | 2  | L-Alanine                                         |
| L-Arg                    | true  | 4  | L-Arginine                                        |
| L-Asn                    | true  | 2  | L-Asparagine                                      |
| L-Asp                    | true  | 5  | L-Aspartate                                       |
| L-Asp_4-semialdehyde     | true  | 3  | L-Aspartate_4-semialdehyde                        |
| L-Citrulline             | true  | 3  | L-Citrulline                                      |
| L-Cys                    | true  | 3  | L-Cysteine                                        |
| L-Gln                    | true  | 5  | L-Glutamine                                       |
| L-Glu                    | true  | 17 | L-Glutamate                                       |
| L-His                    | true  | 3  | L-Histidine                                       |
| L-Histidinol             | true  | 2  | L-Histidinol                                      |
| L-Histidinol_P           | true  | 2  | L-Histidinol_phosphate                            |

## SAP metabolites

|                              |       |    |                                                                                             |
|------------------------------|-------|----|---------------------------------------------------------------------------------------------|
| L-HomoCys                    | true  | 2  | L-Homocysteine                                                                              |
| L-HomoSer                    | true  | 3  | L-Homoserine                                                                                |
| L-Ile                        | true  | 2  | L-Isoleucine                                                                                |
| L-Leu                        | true  | 2  | L-Leucine                                                                                   |
| L-Lys                        | true  | 2  | L-Lysine                                                                                    |
| L-Met                        | true  | 2  | L-Methionine                                                                                |
| L-Orn                        | true  | 5  | L-Ornithine                                                                                 |
| L-PhenylAla                  | true  | 2  | L-Phenylalanine                                                                             |
| L-Pro                        | true  | 3  | L-Proline                                                                                   |
| L-Ser                        | true  | 5  | L-Serine                                                                                    |
| L-Thr                        | true  | 3  | L-Threonine                                                                                 |
| L-Try                        | true  | 2  | L-Tryptophane                                                                               |
| L-Tyr                        | true  | 2  | L-Tyrosine                                                                                  |
| L-Val                        | true  | 2  | L-Valine                                                                                    |
| Leu-tRNA(ex)                 | false | 1  | Leu-tRNA(ex)                                                                                |
| Lys-tRNA(ex)                 | false | 1  | Lys-tRNA(ex)                                                                                |
| Mal                          | true  | 3  | (S)-Malate                                                                                  |
| Met-tRNA(ex)                 | false | 1  | Met-tRNA(ex)                                                                                |
| NAD+                         | false | 12 | NAD+                                                                                        |
| NADH                         | false | 12 | NADH                                                                                        |
| NADP+                        | true  | 11 | NADP+                                                                                       |
| NADPH                        | true  | 11 | NADPH                                                                                       |
| NH3                          | true  | 11 | NH3                                                                                         |
| NH3(ex)                      | false | 1  | NH3(ex)                                                                                     |
| O-Ac-L-Ser                   | true  | 2  | O-Acetyl-L-serine                                                                           |
| O-P-L-homoSer                | true  | 2  | O-Phospho-L-homoserine                                                                      |
| OAA                          | true  | 5  | Oxaloacetate                                                                                |
| OASucc                       | true  | 2  | Oxalosuccinate                                                                              |
| PEP                          | true  | 7  | Phosphoenolpyruvate                                                                         |
| Phe-tRNA(ex)                 | false | 1  | Phe-tRNA(ex)                                                                                |
| PhenylPYR                    | true  | 2  | Phenylpyruvate                                                                              |
| PR-AMP                       | true  | 2  | Phosphoribosyl-AMP                                                                          |
| PR-ATP                       | true  | 2  | Phosphoribosyl-ATP                                                                          |
| PR-formimino-AICAR-P         | true  | 2  | 5-(5-Phospho-D-ribosylaminoformimino)-1-(5-phosphoribosyl)-imidazole-4-carboxamide          |
| Prephenate                   | true  | 3  | Prephenate                                                                                  |
| Pribulosyl-formimino-AICAR-P | true  | 2  | N-(5-Phospho-D-1-ribulosylformimino)-5-amino-1-(5-phospho-D-ribosyl)-4-imidazolecarboxamide |
| Pro-tRNA(ex)                 | false | 1  | Pro-tRNA(ex)                                                                                |
| PRPP                         | true  | 4  | 5-Phospho-D-ribose_1-diphosphate                                                            |
| Purine(ex)                   | false | 1  | Purine(ex)                                                                                  |

SAP metabolites

|                |       |    |                       |
|----------------|-------|----|-----------------------|
| PYR            | true  | 13 | Pyruvate              |
| Pyrimidine(ex) | false | 1  | Pyrimidine(ex)        |
| Ser-tRNA(ex)   | false | 1  | Ser-tRNA(ex)          |
| Shi            | true  | 2  | Shikimate             |
| Shi_3-P        | true  | 2  | Shikimate_3-phosphate |
| Succ           | true  | 3  | Succinate             |
| SuccCoA        | true  | 3  | Succinyl-CoA          |
| Sucrose_6-P    | true  | 1  | Sucrose_6-phosphate   |
| THF            | true  | 2  | Tetrahydrofolate      |
| Thiamin_diP    | true  | 3  | Thiamin_diphosphate   |
| Thr-tRNA(ex)   | false | 1  | Thr-tRNA(ex)          |
| Try-tRNA(ex)   | false | 1  | Try-tRNA(ex)          |
| Tyr-tRNA(ex)   | false | 1  | Tyr-tRNA(ex)          |
| Urea           | true  | 2  | Urea                  |
| Urocanate      | true  | 2  | Urocanate             |
| Val-tRNA(ex)   | false | 1  | Val-tRNA(ex)          |

**Table 8: *S. saprophyticus* network - reactions**

| Enzyme name | rev.? | Reaction equation                                                    | Annotation                                                                                 |
|-------------|-------|----------------------------------------------------------------------|--------------------------------------------------------------------------------------------|
| rn:E0001    | false | L-PhenylAla = Phe-tRNA(ex)                                           | PheX [6.1.1.20]                                                                            |
| rn:E0002    | false | L-Tyr = Tyr-tRNA(ex)                                                 | TyrX [6.1.1.1]                                                                             |
| rn:E0003    | false | L-Try = Try-tRNA(ex)                                                 | TryX [6.1.1.-]                                                                             |
| rn:E0004    | false | L-His = His-tRNA(ex)                                                 | HisX [6.1.1.21]                                                                            |
| rn:E0005    | false | L-Met = Met-tRNA(ex)                                                 | MetX [6.1.1.10]                                                                            |
| rn:E0006    | false | L-Thr = Thr-tRNA(ex)                                                 | ThrX [6.1.1.3]                                                                             |
| rn:E0007    | false | Gly = Gly-tRNA(ex)                                                   | GlyX [6.1.1.14]                                                                            |
| rn:E0008    | false | L-Ser = Ser-tRNA(ex)                                                 | SerX [6.1.1.11]                                                                            |
| rn:E0009    | false | L-Cys = Cys-tRNA(ex)                                                 | CysX [6.1.1.16]                                                                            |
| rn:E0010    | false | L-Lys = Lys-tRNA(ex)                                                 | LysX [6.1.1.6]                                                                             |
| rn:E0011    | false | L-Asn = Asn-tRNA(ex)                                                 | AsnX [6.1.1.22]                                                                            |
| rn:E0012    | false | L-Asp = Asp-tRNA(ex)                                                 | AspX [6.1.1.12]                                                                            |
| rn:E0013    | false | L-Ala = Ala-tRNA(ex)                                                 | AlaX [6.1.1.7]                                                                             |
| rn:E0014    | false | L-Pro = Pro-tRNA(ex)                                                 | ProX [6.1.1.15]                                                                            |
| rn:E0015    | false | L-Arg = Arg-tRNA(ex)                                                 | ArgX [6.1.1.19]                                                                            |
| rn:E0016    | false | L-Glu = Glu-tRNA(ex)                                                 | GluX [6.1.1.17]                                                                            |
| rn:E0017    | false | L-Gln = Gln-tRNA(ex)                                                 | GlnX [6.1.1.17]                                                                            |
| rn:E0018    | false | L-Ile = Ile-tRNA(ex)                                                 | IleX [6.1.1.5]                                                                             |
| rn:E0019    | false | L-Val = Val-tRNA(ex)                                                 | ValX [6.1.1.9]                                                                             |
| rn:E0020    | false | L-Leu = Leu-tRNA(ex)                                                 | LeuX [6.1.1.4]                                                                             |
| rn:N001     | false | AICAR = Purine(ex)                                                   | PurineMeta []                                                                              |
| rn:N002     | false | PRPP = Pyrimidine(ex)                                                | PyrimidineMeta []                                                                          |
| rn:R001     | false | PYR = PEP                                                            | PPDK [2.7.9.1]                                                                             |
| rn:R002     | false | 4-Imidazolone-5-propanoate = 2 L-Glu                                 | HisMetaEnzOxReDase [1.14.13.-]                                                             |
| rn:U0015    | false | 1-(2-Carboxyphenylamino)-1-deoxy-D-Ru_5-P = Indoleglycerol_P         | indole-3-glycerolphosphatesynthase [4.1.1.48]                                              |
| rn:U0018    | false | L-Gln = Carbamoyl_P + L-Glu                                          | carbamoyl-phosphatesynthase [6.3.5.5]                                                      |
| rn:U0020    | false | 23-Dihydrodipicolinate + NADPH = 2345-Tetrahydrodipicolinate + NADP+ | dihydrodipicolinate reductase [1.3.1.26]                                                   |
| rn:U0021    | false | DAHP = DHQ                                                           | 3-dehydroquinate synthase [4.2.3.4]                                                        |
| rn:U0038    | false | 3-Methyl-2-oxobutanoate + L-Glu = AKG + L-Val                        | branched-chain amino acid aminotransferase [2.6.1.42]                                      |
| rn:U0045    | false | 4-Imidazolone-5-propanoate = Formimino-L-Glu                         | imidazolone propionase [3.5.2.7]                                                           |
| rn:U0047    | false | 4-P-L-Asp + NADPH = L-Asp_4-semialdehyde + NADP+                     | aspartate semialdehyde dehydrogenase [1.2.1.11]                                            |
| rn:U0048    | false | PR-formimino-AICAR-P = Pribulosyl-formimino-AICAR-P                  | putative phosphoribosylformimino-5-aminoimidazolecarboxamide ribotide isomerase [5.3.1.16] |
| rn:U0049    | false | 510-MethyleneTHF + Gly = L-Ser + THF                                 | serine hydroxymethyltransferase [2.1.2.1]                                                  |

SAP reactions

|          |       |                                                                                |                                                                                |
|----------|-------|--------------------------------------------------------------------------------|--------------------------------------------------------------------------------|
| rn:U0050 | false | L-HomoCys = L-Met                                                              | 5-methyltetrahydropteroyltriglutamate-homocysteinemethyltransferase [2.1.1.14] |
| rn:U0052 | false | 5-O-(1-Carboxyvinyl)-3-PShi = Chor                                             | chorismatesynthase [4.2.3.5]                                                   |
| rn:U0057 | false | Anthranilate + PRPP = (5-P-D-R)anthranilate                                    | anthranilatephosphoribosyltransferase [2.4.2.18]                               |
| rn:U0058 | false | L-Asp + L-Gln = L-Asn + L-Glu                                                  | asparagine synthase [6.3.5.4]                                                  |
| rn:U0059 | false | L-Asp = 4-P-L-Asp                                                              | asparto kinase II [2.7.2.4]                                                    |
| rn:U0061 | false | L-Glu + NH <sub>3</sub> = L-Gln                                                | glutamine-ammonialigase [6.3.1.2]                                              |
| rn:U0062 | false | L-HomoSer = O-P-L-homoSer                                                      | homoserinekinase [2.7.1.39]                                                    |
| rn:U0065 | false | Shi = Shi_3-P                                                                  | shikimatekinase(SK) [2.7.1.71]                                                 |
| rn:U0068 | false | Carbamoyl_P + L-Orn = L-Citrulline                                             | ornithinecarbamoyltransferase [2.1.3.3]                                        |
| rn:U0072 | false | Chor + NH <sub>3</sub> = Anthranilate + PYR                                    | anthranilatesynthase [4.1.3.27]                                                |
| rn:U0073 | false | Chor = Prephenate                                                              | chorismatemutase [5.4.99.5]                                                    |
|          |       | D-erythro-1-(Imidazol-4-yl)glycerol_3-P = 3-(Imidazol-4-yl)-2-oxopropyl_P      | imidazoleglycerol-phosphatedehydratase [4.2.1.19]                              |
| rn:U0075 | false |                                                                                |                                                                                |
| rn:U0089 | false | L-Arg = L-Citrulline + NH <sub>3</sub>                                         | argininedeiminase [3.5.3.6]                                                    |
| rn:U0090 | false | L-Arg = L-Orn + Urea                                                           | arginase [3.5.3.1]                                                             |
| rn:U0093 | false | L-Glu + OAA = AKG + L-Asp                                                      | aspartate transaminase [2.6.1.1]                                               |
| rn:U0095 | false | L-Asp_4-semialdehyde + PYR = 23-Dihydrodipicolinate                            | dihydrodipicolinate synthase [4.2.1.52]                                        |
| rn:U0100 | true  | L-Glu = D-Glu                                                                  | glutamateracemase [5.1.1.3]                                                    |
| rn:U0104 | false | L-Histidinol + 2 NAD <sup>+</sup> = L-His + 2 NADH                             | putative histidinoldehydrogenase [1.1.1.23]                                    |
| rn:U0105 | false | L-Histidinol_P = L-Histidinol                                                  | putative histidinol phosphatase [3.1.3.15]                                     |
| rn:U0106 | true  | L-HomoSer + NADP <sup>+</sup> = L-Asp_4-semialdehyde + NADPH                   | homoserine dehydrogenase [1.1.1.3]                                             |
| rn:U0112 | false | L-Orn = L-Pro + NH <sub>3</sub>                                                | putative ornithinecyclodeaminase [4.3.1.12]                                    |
| rn:U0114 | false | Ac-CoA + L-Ser = CoA + O-Ac-L-Ser                                              | serineO-acetyltransferase [2.3.1.30]                                           |
| rn:U0116 | false | Indoleglycerol_P + L-Ser = GA_P + L-Try                                        | tryptophan synthase [4.2.1.20]                                                 |
| rn:U0117 | false | NH <sub>3</sub> + PYR = L-Ser                                                  | thereoninedehydratase [4.3.1.19, 4.3.1.17]                                     |
| rn:U0121 | false | L-Thr = 2-Oxobutanoate + NH <sub>3</sub>                                       | thereoninedehydratase [4.3.1.19]                                               |
|          |       | Pribulosyl-formimino-AICAR-P = AICAR + D-erythro-1-(Imidazol-4-yl)glycerol_3-P | amidotransferasehisH [2.4.2.-]                                                 |
| rn:U0125 | false |                                                                                |                                                                                |
| rn:U0126 | false | (5-P-D-R)anthranilate = 1-(2-Carboxyphenylamino)-1-deoxy-D-Ru_5-P              | phosphoriborylanthranilateisomerase [5.3.1.24]                                 |
| rn:U0134 | false | Formimino-L-Glu = Formamide + L-Glu                                            | hypothetical protein,similartoformiminoglutamase [3.5.3.8]                     |
| rn:U0138 | false | O-P-L-homoSer = L-Thr                                                          | threoninesynthase [4.2.3.1]                                                    |
| rn:U0141 | false | D-E4P + PEP = DAHP                                                             | phospho-2-dehydro-3-deoxyheptonate aldo [2.5.1.54]                             |
| rn:U0142 | false | PEP + Shi_3-P = 5-O-(1-Carboxyvinyl)-3-PShi                                    | 3-phosphoshikimate1-carboxyvinyltransferase [2.5.1.19]                         |
| rn:U0143 | false | PR-AMP = PR-formimino-AICAR-P                                                  | histidinebiosynthesisbifunctionalproteinHisIE [3.5.4.19]                       |
| rn:U0144 | false | PR-ATP = PR-AMP                                                                | histidinebiosynthesisbifunctionalproteinHisIE [3.6.1.31]                       |
| rn:U0145 | false | PRPP = PR-ATP                                                                  | ATPphosphoribosyltransferase [2.4.2.17]                                        |
| rn:U0146 | false | NAD <sup>+</sup> + Prephenate = 3-(4-Hydroxyphenyl)PYR + NADH                  | prephenatedehydrogenase [1.3.1.12]                                             |



## SAP reactions

|          |       |                                                                |                                                                  |
|----------|-------|----------------------------------------------------------------|------------------------------------------------------------------|
| rn:U0147 | false | Prephenate = PhenylPYR                                         | prephenate dehydratase [4.2.1.51]                                |
| rn:U0155 | false | 3-DehydroShi + NADPH = NADP+ + Shi                             | shikimate dehydrogenase [1.1.1.25]                               |
| rn:U0160 | false | Urea = 2 NH <sub>3</sub>                                       | urease [3.5.1.5]                                                 |
| rn:U0161 | false | Urocanate = 4-Imidazolone-5-propanoate                         | urocanate hydratase [4.2.1.49]                                   |
| rn:U0166 | false | 3-(Imidazol-4-yl)-2-oxopropyl_P + L-Glu = AKG + L-Histidinol_P | putative histidinol-phosphate aminotransferase [2.6.1.9]         |
| rn:U0167 | false | L-Glu + PhenylPYR = AKG + L-PhenylAla                          | putative histidinol-phosphate aminotransferase [2.6.1.9]         |
| rn:U0168 | false | 3-(4-Hydroxyphenyl)PYR + L-Glu = AKG + L-Tyr                   | putative histidinol-phosphate transaminase [2.6.1.9]             |
| rn:U0179 | false | Acetaldehyde + NAD+ = Ac + NADH                                | aldehyde dehydrogenase [1.2.1.3]                                 |
| rn:U0188 | false | DHQ = 3-DehydroShi                                             | enolase [4.2.1.11, 4.2.1.10]                                     |
| rn:U0195 | false | PYR + Thiamin_diP = 2-(A-Hydroxyethyl)thiamine_diP             | pyruvate dehydrogenase_ acetolactate synthase [1.2.4.1, 2.2.1.6] |
| rn:U0198 | false | O-Ac-L-Ser = Ac + L-Cys                                        | cysteine synthase [2.5.1.47]                                     |
| rn:U0209 | false | D-Ala = L-Ala                                                  | alanine racemase [5.1.1.1]                                       |
| rn:U0238 | false | GA_P + NAD+ = 3-P-D-glyceroyl_P + NADH                         | glyceraldehyde-3-phosphate dehydrogenase [1.2.1.12]              |
| rn:U0239 | false | Glycerone_P = GA_P                                             | triose phosphate isomerase [5.3.1.1]                             |
| rn:U0244 | false | Mal + NAD+ = NADH + OAA                                        | MDH [1.1.1.37]                                                   |
| rn:U0245 | true  | Mal + NAD+ = NADH + PYR                                        | malate dehydrogenase homolog [1.1.1.38]                          |
| rn:U0246 | false | Fum = Mal                                                      | fumarate hydratase, class-II [4.2.1.2]                           |
| rn:U0255 | false | 3-P-D-GA = 2-P-D-GA                                            | phosphoglycerate mutase [5.4.2.1]                                |
| rn:U0256 | false | 2-P-D-GA = PEP                                                 | enolase [4.2.1.11]                                               |
| rn:U0260 | false | 6PGlucon + NADP+ = D-Ru_5-P + NADPH                            | phosphogluconate dehydrogenase [1.1.1.44]                        |
| rn:U0267 | false | Ac-CoA + OAA = Cit + CoA                                       | citrate synthase [2.3.3.1]                                       |
| rn:U0269 | false | PEP = PYR                                                      | pyruvate kinase [2.7.1.40]                                       |
| rn:U0270 | false | 3-P-D-glyceroyl_P = 3-P-D-GA                                   | phosphoglycerate kinase [2.7.2.3]                                |
| rn:U0271 | false | Ac + CoA = Ac-CoA                                              | acetyl-CoA synthetase AND ligase [6.2.1.1]                       |
| rn:U0274 | false | D-F = D-F_6-P                                                  | fructokinase, putative [2.7.1.4]                                 |
| rn:U0276 | false | D-F_6-P = D-F_16-BP                                            | 6-phosphofructokinase [2.7.1.11]                                 |
| rn:U0280 | false | D-Ri_5-P = PRPP                                                | ribose-phosphate pyrophosphokinase [2.7.6.1]                     |
| rn:U0284 | false | OAA = PEP                                                      | phosphoenolpyruvate carboxykinase [4.1.1.49]                     |
| rn:U0287 | false | PYR = OAA                                                      | pyruvate carboxylase [6.4.1.1]                                   |
| rn:U0288 | true  | CoA + Succ = SuccCoA                                           | succinyl-CoA synthetase [6.2.1.5]                                |
| rn:U0294 | false | D-F_16-BP = D-F_6-P                                            | fructose-bisphosphatase [3.1.3.11]                               |
| rn:U0295 | true  | D-F_6-P + GA_P = D-E4P + D-Xu_5-P                              | transketolase [2.2.1.1]                                          |
| rn:U0297 | false | D-Glucono-15-lactone_6-P = 6PGlucon                            | Spon_PGLactonohydrolase [3.1.1.31]                               |
| rn:U0301 | false | D-G_6-P + NADP+ = D-Glucono-15-lactone_6-P + NADPH             | glucose-6-phosphate 1-dehydrogenase [1.1.1.49]                   |
| rn:U0302 | false | D-G_6-P = D-F_6-P                                              | glucose-6-phosphate isomerase A [5.3.1.9]                        |
| rn:U0311 | false | D-Ru_5-P = D-Ri_5-P                                            | ribose 5-phosphate isomerase A [5.3.1.6]                         |
| rn:U0314 | false | D-Ru_5-P = D-Xu_5-P                                            | ribulose-phosphate 3-epimerase [5.1.3.1]                         |
| rn:U0315 | true  | D-S7P + GA_P = D-E4P + D-F_6-P                                 | Transaldolase superfamily [2.2.1.2]                              |

## SAP reactions

|          |       |                                                                                                     |                                                                  |
|----------|-------|-----------------------------------------------------------------------------------------------------|------------------------------------------------------------------|
| rn:U0316 | true  | D-S7P + GA_P = D-Ri_5-P + D-Xu_5-P                                                                  | transketolase [2.2.1.1]                                          |
| rn:U0324 | false | IsoCit + NADP+ = NADPH + OASucc                                                                     | isocitrate dehydrogenase [1.1.1.42]                              |
| rn:U0335 | false | OASucc = AKG                                                                                        | isocitrate dehydrogenase [1.1.1.42]                              |
| rn:U0345 | false | FAD + Succ = FADH2 + Fum                                                                            | succinate dehydrogenase [1.3.99.1]                               |
| rn:U0348 | false | Sucrose_6-P = D-F + D-G_6-P                                                                         | sucrose-6-phosphatehydrolase [3.2.1.26]                          |
| rn:U0358 | false | cis-Acon = IsoCit                                                                                   | aconitate hydratase [4.2.1.3]                                    |
| rn:U0359 | false | Cit = cis-Acon                                                                                      | aconitate hydratase [4.2.1.3]                                    |
| rn:U0360 | false | D-F_16-BP = GA_P + Glycerone_P                                                                      | fructose-bisphosphate aldolase [4.1.2.13]                        |
| rn:U0372 | false | AKG + L-Gln + NADPH = 2 L-Glu + NADP+                                                               | glutamatesynthase [1.4.1.13]                                     |
| rn:U0384 | false | L-His = NH3 + Urocanate                                                                             | histidineammonia-lyase [4.3.1.3]                                 |
| rn:U0522 | true  | NH3(ex) = NH3                                                                                       | probabile ammonium transporter [2.A.49]                          |
| rn:U0534 | false | D-G(ex) + PEP = D-G_6-P + PYR                                                                       | glucose-specific PTS [2.7.1.69, 2.7.3.9]                         |
| rn:U0673 | true  | AKG + D-Ala = D-Glu + PYR                                                                           | D-alanineaminotransferase [2.6.1.21]                             |
| rn:U0986 | false | 2 L-Glu + NADH = AKG + L-Orn + NAD+                                                                 | EZComp_UreaOrnSyn [1.5.1.12, 2.6.1.13]                           |
| rn:U0987 | false | 2345-Tetrahydrodipicolinate + L-Glu + SuccCoA = AKG + CoA + L-Lys + Succ                            | EZComp_LysSyn [2.3.1.117, 2.6.1.17, 3.5.1.18, 5.1.1.7, 4.1.1.20] |
| rn:U0988 | false | AKG + CoA + NAD+ = NADH + SuccCoA                                                                   | EZComp_TCASuccinyl [1.2.4.2, 2.3.1.61, 1.8.1.4]                  |
| rn:U0989 | false | 2-(A-Hydroxyethyl)thiamine_diP + 2-Oxobutanoate + L-Glu + NADPH = AKG + L-Ile + NADP+ + Thiamin_diP | EZComp_Ile_Meta [2.2.1.6, 1.1.1.86, 4.2.1.9, 2.6.1.42]           |
| rn:U0990 | false | 2-(A-Hydroxyethyl)thiamine_diP + NADPH + PYR = 3-Methyl-2-oxobutanoate + NADP+ + Thiamin_diP        | EZComp_Val_Meta [2.2.1.6, 1.1.1.86, 4.2.1.9]                     |
| rn:U0991 | false | 3-Methyl-2-oxobutanoate + Ac-CoA + L-Glu + NAD+ = AKG + CoA + L-Leu + NADH                          | EZComp_Leu_Meta [2.3.3.13, 4.2.1.33, 1.1.1.85, 2.6.1.42]         |
| rn:U0993 | false | L-Asp + L-Citrulline = Fum + L-Arg                                                                  | EZComp_Fum_Asp [4.3.2.1, 6.3.4.5]                                |
| rn:U0994 | false | CoA + NAD+ + PYR = Ac-CoA + NADH                                                                    | EZComp_PyrAcetylCoA [1.2.4.1, 2.3.1.12, 1.8.1.4]                 |
| rn:U0995 | false | Gly + NAD+ + THF = 510-MethyleneTHF + NADH + NH3                                                    | EZComp_GlySerThrMeta [2.1.2.10, 1.8.1.4, 1.4.4.2]                |
| rn:U0996 | false | Ac-CoA + L-Cys + L-HomoSer = Ac + CoA + L-HomoCys + NH3 + PYR                                       | EZComp_MetMeta [2.3.1.31, 2.5.1.48, 4.4.1.8]                     |
| rn:U0997 | false | AKG + L-Orn + NADH + 2 NADPH = 2 L-Pro + NAD+ + 2 NADP+                                             | EZComp_UreaMeta [1.5.1.2, 1.5.1.12, 2.6.1.13]                    |

**Table 9: *S. saprophyticus* network - Elementary Modes discussed in the results section<sup>1</sup>**

| # | Flux sum | Rev. <sup>2</sup> | Length | Reactions <sup>3</sup>                                                                                                                                                                                                                                                                                                                               | Net reaction                                                                            |
|---|----------|-------------------|--------|------------------------------------------------------------------------------------------------------------------------------------------------------------------------------------------------------------------------------------------------------------------------------------------------------------------------------------------------------|-----------------------------------------------------------------------------------------|
| 4 | 190      | false             | 25     | (12 m:E0012) (12 m:U0061) (12 m:U0093) (12 m:U0238) (12 m:U0239) (12 m:U0244) (-12 m:U0245) (12 m:U0255) (12 m:U0256) (6 m:U0260) (5 m:U0269) (12 m:U0270) (5 m:U0276) (-2 m:U0295) (6 m:U0297) (6 m:U0301) (1 m:U0302) (2 m:U0311) (4 m:U0314) (2 m:U0315) (-2 m:U0316) (5 m:U0360) (12 m:U0372) (12 m:U0522) (7 m:U0534)                           | 5 7 D-G(ex) + 12 NAD <sup>+</sup> + 12 NH <sub>3</sub> (ex) = 12 Asp-tRNA(ex) + 12 NADH |
| 5 | 226      | false             | 26     | (12 m:E0011) (12 m:U0058) (24 m:U0061) (12 m:U0093) (12 m:U0238) (5 m:U0239) (12 m:U0244) (-12 m:U0245) (12 m:U0255) (12 m:U0256) (6 m:U0260) (5 m:U0269) (12 m:U0270) (5 m:U0276) (-2 m:U0295) (6 m:U0297) (6 m:U0301) (1 m:U0302) (2 m:U0311) (4 m:U0314) (2 m:U0315) (-2 m:U0316) (5 m:U0360) (12 m:U0372) (24 m:U0522) (7 m:U0534)               | 7 D-G(ex) + 12 NAD <sup>+</sup> + 24 NH <sub>3</sub> (ex) = 12 Asn-tRNA(ex) + 12 NADH   |
| 6 | 103      | false             | 27     | (5 m:E0008) (6 m:U0061) (6 m:U0089) (6 m:U0093) (5 m:U0117) (5 m:U0238) (2 m:U0239) (6 m:U0244) (6 m:U0246) (5 m:U0255) (5 m:U0256) (3 m:U0260) (2 m:U0269) (5 m:U0270) (2 m:U0276) (-1 m:U0295) (3 m:U0297) (3 m:U0301) (1 m:U0311) (2 m:U0314) (1 m:U0315) (-1 m:U0316) (2 m:U0360) (6 m:U0372) (5 m:U0522) (3 m:U0534) (6 m:U0993)                | 3 D-G(ex) + 11 NAD <sup>+</sup> + 5 NH <sub>3</sub> (ex) = 11 NADH + 5 Ser-tRNA(ex)     |
| 7 | 88       | false             | 27     | (5 m:E0012) (6 m:U0061) (1 m:U0089) (6 m:U0093) (5 m:U0238) (2 m:U0239) (6 m:U0244) (-5 m:U0245) (1 m:U0246) (5 m:U0255) (5 m:U0256) (3 m:U0260) (2 m:U0269) (5 m:U0270) (2 m:U0276) (-1 m:U0295) (3 m:U0297) (3 m:U0301) (1 m:U0311) (2 m:U0314) (1 m:U0315) (-1 m:U0316) (2 m:U0360) (6 m:U0372) (5 m:U0522) (3 m:U0534) (1 m:U0993)               | 3 D-G(ex) + 6 NAD <sup>+</sup> + 5 NH <sub>3</sub> (ex) = 5 Asp-tRNA(ex) + 6 NADH       |
| 8 | 103      | false             | 28     | (5 m:E0011) (5 m:U0058) (11 m:U0061) (1 m:U0089) (6 m:U0093) (5 m:U0238) (2 m:U0239) (6 m:U0244) (-5 m:U0245) (1 m:U0246) (5 m:U0255) (5 m:U0256) (3 m:U0260) (2 m:U0269) (5 m:U0270) (2 m:U0276) (-1 m:U0295) (3 m:U0297) (3 m:U0301) (1 m:U0311) (2 m:U0314) (1 m:U0315) (-1 m:U0316) (2 m:U0360) (6 m:U0372) (10 m:U0522) (3 m:U0534) (1 m:U0993) | 3 D-G(ex) + 6 NAD <sup>+</sup> + 10 NH <sub>3</sub> (ex) = 5 Asn-tRNA(ex) + 6 NADH      |

## SAP EMs

|    |     |       |    |                                                                                                                                                                                                                                                                                                                                                                                                                                |                                                                                                     |
|----|-----|-------|----|--------------------------------------------------------------------------------------------------------------------------------------------------------------------------------------------------------------------------------------------------------------------------------------------------------------------------------------------------------------------------------------------------------------------------------|-----------------------------------------------------------------------------------------------------|
| 21 | 188 | false | 32 | (1 m:E0010) (8 m:E0011) (1 m:U0020) (1 m:U0047) (8 m:U0058) (1 m:U0059) (18 m:U0061) (9 m:U0093) (1 m:U0095) (10 m:U0238) (4 m:U0239) (9 m:U0244) (-9 m:U0245) (10 m:U0255) (10 m:U0256) (6 m:U0260) (4 m:U0269) (10 m:U0270) (4 m:U0276) (1 m:U0288) (-2 m:U0295) (6 m:U0297) (6 m:U0301) (2 m:U0311) (4 m:U0314) (2 m:U0315) (-2 m:U0316) (4 m:U0360) (10 m:U0372) (18 m:U0522) (6 m:U0534) (1 m:U0987)                      | 6 D-G(ex) + 10 NAD <sup>+</sup> + 18 NH <sub>3</sub> (ex) = 8 Asn-tRNA(ex) + Lys-tRNA(ex) + 10 NADH |
| 22 | 136 | false | 34 | (1 m:E0010) (4 m:E0019) (1 m:U0020) (4 m:U0038) (1 m:U0047) (1 m:U0059) (6 m:U0061) (1 m:U0093) (1 m:U0095) (4 m:U0195) (10 m:U0238) (4 m:U0239) (1 m:U0244) (-1 m:U0245) (10 m:U0255) (10 m:U0256) (6 m:U0260) (4 m:U0269) (10 m:U0270) (4 m:U0276) (1 m:U0288) (-2 m:U0295) (6 m:U0297) (6 m:U0301) (2 m:U0311) (4 m:U0314) (2 m:U0315) (-2 m:U0316) (4 m:U0360) (6 m:U0372) (6 m:U0522) (6 m:U0534) (1 m:U0987) (4 m:U0990) | 6 D-G(ex) + 10 NAD <sup>+</sup> + 6 NH <sub>3</sub> (ex) = Lys-tRNA(ex) + 10 NADH + 4 Val-tRNA(ex)  |
| 24 | 88  | false | 29 | (5 m:E0013) (6 m:U0061) (1 m:U0089) (1 m:U0093) (5 m:U0100) (5 m:U0209) (5 m:U0238) (2 m:U0239) (1 m:U0244) (1 m:U0246) (5 m:U0255) (5 m:U0256) (3 m:U0260) (2 m:U0269) (5 m:U0270) (2 m:U0276) (-1 m:U0295) (3 m:U0297) (3 m:U0301) (1 m:U0311) (2 m:U0314) (1 m:U0315) (-1 m:U0316) (2 m:U0360) (6 m:U0372) (5 m:U0522) (3 m:U0534) (-5 m:U0673) (1 m:U0993)                                                                 | 3 D-G(ex) + 6 NAD <sup>+</sup> + 5 NH <sub>3</sub> (ex) = 5 Ala-tRNA(ex) + 6 NADH                   |

<sup>1</sup> complete list available from the authors on request

<sup>2</sup> reversible

<sup>3</sup> reaction identifiers are taken from KEGG, for annotations see the reaction table

**Table 10: *S. aureus* network - metabolites**

| <b>Name</b>                               | <b>internal?</b> | <b>Connectivity</b> | <b>Description</b>                                      |
|-------------------------------------------|------------------|---------------------|---------------------------------------------------------|
| (5-P-D-R)anthranilate                     | true             | 2                   | N-(5-Phospho-D-ribosyl)anthranilate                     |
| 1-(2-Carboxyphenylamino)-1-deoxy-D-Ru_5-P | true             | 2                   | 1-(2-Carboxyphenylamino)-1-deoxy-D-ribulose_5-phosphate |
| 2-(A-Hydroxyethyl)thiamine_diP            | true             | 3                   | 2-(alpha-Hydroxyethyl)thiamine_diphosphate              |
| 2-Oxobutanoate                            | true             | 2                   | 2-Oxobutanoate                                          |
| 2-P-D-GA                                  | true             | 2                   | 2-Phospho-D-glycerate                                   |
| 23-Dihydrodipicolinate                    | true             | 2                   | 2,3-Dihydrodipicolinate                                 |
| 2345-Tetrahydrodipicolinate               | true             | 2                   | 2,3,4,5-Tetrahydrodipicolinate                          |
| 3-(4-Hydroxyphenyl)PYR                    | true             | 2                   | 3-(4-Hydroxyphenyl)pyruvate                             |
| 3-(Imidazol-4-yl)-2-oxopropyl_P           | true             | 2                   | 3-(Imidazol-4-yl)-2-oxopropyl_phosphate                 |
| 3-DehydroShi                              | true             | 2                   | 3-Dehydroshikimate                                      |
| 3-Methyl-2-oxobutanoate                   | true             | 3                   | 3-Methyl-2-oxobutanoate                                 |
| 3-P-D-GA                                  | true             | 2                   | 3-Phospho-D-glycerate                                   |
| 3-P-D-glyceroyl_P                         | true             | 2                   | 3-Phospho-D-glyceroyl_phosphate                         |
| 4-Imidazolone-5-propanoate                | true             | 2                   | 4-Imidazolone-5-propanoate                              |
| 4-P-L-Asp                                 | true             | 2                   | 4-Phospho-L-aspartate                                   |
| 5-O-(1-Carboxyvinyl)-3-PShi               | true             | 2                   | 5-O-(1-Carboxyvinyl)-3-phosphoshikimate                 |
| 510-MethyleneTHF                          | true             | 2                   | 5,10-Methylenetetrahydrofolate                          |
| 6PGlucon                                  | true             | 2                   | 6-Phospho-D-gluconate                                   |
| Ac                                        | true             | 4                   | Acetate                                                 |
| Ac-CoA                                    | true             | 6                   | Acetyl-CoA                                              |
| Acetaldehyde                              | true             | 2                   | Acetaldehyde                                            |
| AICAR                                     | true             | 2                   | 1-(5-Phosphoribosyl)-5-amino-4-imidazolecarboxamide     |
| AKG                                       | true             | 14                  | 2-Oxoglutarate                                          |
| Ala-tRNA(ex)                              | false            | 1                   | Ala-tRNA(ex)                                            |
| Anthranilate                              | true             | 2                   | Anthranilate                                            |
| Arg-tRNA(ex)                              | false            | 1                   | Arg-tRNA(ex)                                            |
| Asn-tRNA(ex)                              | false            | 1                   | Asn-tRNA(ex)                                            |
| Asp-tRNA(ex)                              | false            | 1                   | Asp-tRNA(ex)                                            |
| Carbamoyl_P                               | true             | 3                   | Carbamoyl_phosphate                                     |
| Chor                                      | true             | 3                   | Chorismate                                              |
| cis-Acon                                  | true             | 2                   | cis-Aconitate                                           |
| Cit                                       | true             | 2                   | Citrate                                                 |
| CoA                                       | true             | 9                   | CoA                                                     |
| Cys-tRNA(ex)                              | false            | 1                   | Cys-tRNA(ex)                                            |
| D-Ala                                     | true             | 2                   | D-Alanine                                               |
| D-E4P                                     | true             | 3                   | D-Erythrose_4-phosphate                                 |
| D-erythro-1-(Imidazol-4-yl)glycerol_3-P   | true             | 2                   | D-erythro-1-(Imidazol-4-yl)glycerol_3-phosphate         |

## SA metabolites

|                          |       |    |                                                   |
|--------------------------|-------|----|---------------------------------------------------|
| D-F                      | true  | 2  | D-Fructose                                        |
| D-F_16-BP                | true  | 3  | D-Fructose_1,6-bisphosphate                       |
| D-F_6-P                  | true  | 6  | D-Fructose_6-phosphate                            |
| D-G(ex)                  | false | 1  | D-Glucose(ex)                                     |
| D-G_6-P                  | true  | 4  | D-Glucose_6-phosphate                             |
| D-Glu                    | true  | 2  | D-Glutamate                                       |
| D-Glucono-15-lactone_6-P | true  | 2  | D-Glucono-1,5-lactone_6-phosphate                 |
| D-Ri_5-P                 | true  | 3  | D-Ribose_5-phosphate                              |
| D-Ru_5-P                 | true  | 3  | D-Ribulose_5-phosphate                            |
| D-S7P                    | true  | 2  | D-Sedoheptulose_7-phosphate                       |
| D-Xu_5-P                 | true  | 3  | D-Xylulose_5-phosphate                            |
| DAHP                     | true  | 2  | 2-Dehydro-3-deoxy-D-arabino-heptonate_7-phosphate |
| DHQ                      | true  | 2  | 3-Dehydroquinate                                  |
| FAD                      | false | 1  | FAD                                               |
| FADH2                    | false | 1  | FADH2                                             |
| Formamide                | true  | 1  | Formamide                                         |
| Formimino-L-Glu          | true  | 2  | N-Formimino-L-glutamate                           |
| Fum                      | true  | 3  | Fumarate                                          |
| GA_P                     | true  | 7  | (2R)-2-Hydroxy-3-(phosphonoxy)-propanal           |
| Gln-tRNA(ex)             | false | 1  | Gln-tRNA(ex)                                      |
| Glu-tRNA(ex)             | false | 1  | Glu-tRNA(ex)                                      |
| Gly                      | true  | 4  | Glycine                                           |
| Gly-tRNA(ex)             | false | 1  | Gly-tRNA(ex)                                      |
| Glycerone_P              | true  | 2  | Glycerone_phosphate                               |
| His-tRNA(ex)             | false | 1  | His-tRNA(ex)                                      |
| Ile-tRNA(ex)             | false | 1  | Ile-tRNA(ex)                                      |
| Indoleglycerol_P         | true  | 2  | Indoleglycerol_phosphate                          |
| IsoCit                   | true  | 2  | Isocitrate                                        |
| L-Ala                    | true  | 2  | L-Alanine                                         |
| L-Arg                    | true  | 4  | L-Arginine                                        |
| L-Asn                    | true  | 2  | L-Asparagine                                      |
| L-Asp                    | true  | 5  | L-Aspartate                                       |
| L-Asp_4-semialdehyde     | true  | 3  | L-Aspartate_4-semialdehyde                        |
| L-Citrulline             | true  | 3  | L-Citrulline                                      |
| L-Cys                    | true  | 3  | L-Cysteine                                        |
| L-Gln                    | true  | 5  | L-Glutamine                                       |
| L-Glu                    | true  | 16 | L-Glutamate                                       |
| L-His                    | true  | 3  | L-Histidine                                       |
| L-Histidinol             | true  | 2  | L-Histidinol                                      |
| L-Histidinol_P           | true  | 2  | L-Histidinol_phosphate                            |

## SA metabolites

|                              |       |    |                                                                                             |
|------------------------------|-------|----|---------------------------------------------------------------------------------------------|
| L-HomoCys                    | true  | 2  | L-Homocysteine                                                                              |
| L-HomoSer                    | true  | 3  | L-Homoserine                                                                                |
| L-Ile                        | true  | 2  | L-Isoleucine                                                                                |
| L-Leu                        | true  | 2  | L-Leucine                                                                                   |
| L-Lys                        | true  | 2  | L-Lysine                                                                                    |
| L-Met                        | true  | 2  | L-Methionine                                                                                |
| L-Orn                        | true  | 5  | L-Ornithine                                                                                 |
| L-PhenylAla                  | true  | 2  | L-Phenylalanine                                                                             |
| L-Pro                        | true  | 3  | L-Proline                                                                                   |
| L-Ser                        | true  | 5  | L-Serine                                                                                    |
| L-Thr                        | true  | 4  | L-Threonine                                                                                 |
| L-Try                        | true  | 2  | L-Tryptophane                                                                               |
| L-Tyr                        | true  | 2  | L-Tyrosine                                                                                  |
| L-Val                        | true  | 2  | L-Valine                                                                                    |
| Leu-tRNA(ex)                 | false | 1  | Leu-tRNA(ex)                                                                                |
| Lys-tRNA(ex)                 | false | 1  | Lys-tRNA(ex)                                                                                |
| Mal                          | true  | 3  | (S)-Malate                                                                                  |
| Menaquinol                   | true  | 1  | Menaquinol                                                                                  |
| Menaquinone                  | true  | 1  | Menaquinone                                                                                 |
| Met-tRNA(ex)                 | false | 1  | Met-tRNA(ex)                                                                                |
| NAD+                         | false | 11 | NAD+                                                                                        |
| NADH                         | false | 11 | NADH                                                                                        |
| NADP+                        | true  | 11 | NADP+                                                                                       |
| NADPH                        | true  | 11 | NADPH                                                                                       |
| NH3                          | true  | 12 | NH3                                                                                         |
| NH3(ex)                      | false | 1  | NH3(ex)                                                                                     |
| O-Ac-L-Ser                   | true  | 2  | O-Acetyl-L-serine                                                                           |
| O-P-L-homoSer                | true  | 2  | O-Phospho-L-homoserine                                                                      |
| OAA                          | true  | 5  | Oxaloacetate                                                                                |
| OASucc                       | true  | 2  | Oxalosuccinate                                                                              |
| PEP                          | true  | 6  | Phosphoenolpyruvate                                                                         |
| Phe-tRNA(ex)                 | false | 1  | Phe-tRNA(ex)                                                                                |
| PhenylPYR                    | true  | 2  | Phenylpyruvate                                                                              |
| PR-AMP                       | true  | 2  | Phosphoribosyl-AMP                                                                          |
| PR-ATP                       | true  | 2  | Phosphoribosyl-ATP                                                                          |
| PR-formimino-AICAR-P         | true  | 2  | 5-(5-Phospho-D-ribosylaminoformimino)-1-(5-phosphoribosyl)-imidazole-4-carboxamide          |
| Prephenate                   | true  | 3  | Prephenate                                                                                  |
| Pribulosyl-formimino-AICAR-P | true  | 2  | N-(5-Phospho-D-1-ribulosylformimino)-5-amino-1-(5-phospho-D-ribosyl)-4-imidazolecarboxamide |
| Pro-tRNA(ex)                 | false | 1  | Pro-tRNA(ex)                                                                                |
| PRPP                         | true  | 4  | 5-Phospho-D-ribose_1-diphosphate                                                            |

SA metabolites

|                |       |    |                       |
|----------------|-------|----|-----------------------|
| Purine(ex)     | false | 1  | Purine(ex)            |
| PYR            | true  | 12 | Pyruvate              |
| Pyrimidine(ex) | false | 1  | Pyrimidine(ex)        |
| Ser-tRNA(ex)   | false | 1  | Ser-tRNA(ex)          |
| Shi            | true  | 2  | Shikimate             |
| Shi_3-P        | true  | 2  | Shikimate_3-phosphate |
| Succ           | true  | 3  | Succinate             |
| SuccCoA        | true  | 3  | Succinyl-CoA          |
| Sucrose_6-P    | true  | 1  | Sucrose_6-phosphate   |
| THF            | true  | 2  | Tetrahydrofolate      |
| Thiamin_diP    | true  | 3  | Thiamin_diphosphate   |
| Thr-tRNA(ex)   | false | 1  | Thr-tRNA(ex)          |
| Try-tRNA(ex)   | false | 1  | Try-tRNA(ex)          |
| Tyr-tRNA(ex)   | false | 1  | Tyr-tRNA(ex)          |
| Urea           | true  | 2  | Urea                  |
| Urocanate      | true  | 2  | Urocanate             |
| Val-tRNA(ex)   | false | 1  | Val-tRNA(ex)          |



**Table 11: *S. aureus* network - reactions**

| Enzyme name | rev.? | Reaction equation                                                    | Annotation                                                                                |
|-------------|-------|----------------------------------------------------------------------|-------------------------------------------------------------------------------------------|
| RN:E0001    | false | L-PhenylAla = Phe-tRNA(ex)                                           | PheX [6.1.1.20]                                                                           |
| RN:E0002    | false | L-Tyr = Tyr-tRNA(ex)                                                 | TyrX [6.1.1.1]                                                                            |
| RN:E0003    | false | L-Try = Try-tRNA(ex)                                                 | TryX [6.1.1.-]                                                                            |
| RN:E0004    | false | L-His = His-tRNA(ex)                                                 | HisX [6.1.1.21]                                                                           |
| RN:E0005    | false | L-Met = Met-tRNA(ex)                                                 | MetX [6.1.1.10]                                                                           |
| RN:E0006    | false | L-Thr = Thr-tRNA(ex)                                                 | ThrX [6.1.1.3]                                                                            |
| RN:E0007    | false | Gly = Gly-tRNA(ex)                                                   | GlyX [6.1.1.14]                                                                           |
| RN:E0008    | false | L-Ser = Ser-tRNA(ex)                                                 | SerX [6.1.1.11]                                                                           |
| RN:E0009    | false | L-Cys = Cys-tRNA(ex)                                                 | CysX [6.1.1.16]                                                                           |
| RN:E0010    | false | L-Lys = Lys-tRNA(ex)                                                 | LysX [6.1.1.6]                                                                            |
| RN:E0011    | false | L-Asn = Asn-tRNA(ex)                                                 | AsnX [6.1.1.22]                                                                           |
| RN:E0012    | false | L-Asp = Asp-tRNA(ex)                                                 | AspX [6.1.1.12]                                                                           |
| RN:E0013    | false | L-Ala = Ala-tRNA(ex)                                                 | AlaX [6.1.1.7]                                                                            |
| RN:E0014    | false | L-Pro = Pro-tRNA(ex)                                                 | ProX [6.1.1.15]                                                                           |
| RN:E0015    | false | L-Arg = Arg-tRNA(ex)                                                 | ArgX [6.1.1.19]                                                                           |
| RN:E0016    | false | L-Glu = Glu-tRNA(ex)                                                 | GluX [6.1.1.17]                                                                           |
| RN:E0017    | false | L-Gln = Gln-tRNA(ex)                                                 | GlnX [6.1.1.17]                                                                           |
| RN:E0018    | false | L-Ile = Ile-tRNA(ex)                                                 | IleX [6.1.1.5]                                                                            |
| RN:E0019    | false | L-Val = Val-tRNA(ex)                                                 | ValX [6.1.1.9]                                                                            |
| RN:E0020    | false | L-Leu = Leu-tRNA(ex)                                                 | LeuX [6.1.1.4]                                                                            |
| RN:Nucl01   | false | AICAR = Purine(ex)                                                   | PurineMeta []                                                                             |
| RN:Nucl02   | false | PRPP = Pyrimidine(ex)                                                | PyrimidineMeta []                                                                         |
| RN:R0015    | false | 1-(2-Carboxyphenylamino)-1-deoxy-D-Ru_5-P = Indoleglycerol_P         | indole-3-glycerolphosphatesynthase [4.1.1.48]                                             |
| RN:R0018    | false | L-Gln = Carbamoyl_P + L-Glu                                          | carbamoyl-phosphatesynthase [6.3.5.5]                                                     |
| RN:R0020    | false | 23-Dihydrodipicolinate + NADPH = 2345-Tetrahydrodipicolinate + NADP+ | dihydrodipicolinate reductase [1.3.1.26]                                                  |
| RN:R0021    | false | DAHPh = DHQ                                                          | 3-dehydroquinatesynthase [4.2.3.4]                                                        |
| RN:R0038    | false | 3-Methyl-2-oxobutanoate + L-Glu = AKG + L-Val                        | branched-chainaminoacidaminotransferase [2.6.1.42]                                        |
| RN:R0045    | false | 4-Imidazolone-5-propanoate = Formimino-L-Glu                         | imidazolonepropionase [3.5.2.7]                                                           |
| RN:R0047    | false | 4-P-L-Asp + NADPH = L-Asp_4-semialdehyde + NADP+                     | aspartate semialdehyde dehydrogenase [1.2.1.11]                                           |
| RN:R0048    | false | PR-formimino-AICAR-P = Pribulosyl-formimino-AICAR-P                  | putative phosphoribosylformimino-5-aminoimidazolecarboxamideriboti-deisomerase [5.3.1.16] |
| RN:R0049    | false | 510-MethyleneTHF + Gly = L-Ser + THF                                 | serinehydroxymethyltransferase [2.1.2.1]                                                  |
| RN:R0050    | false | L-HomoCys = L-Met                                                    | 5-methyltetrahydropteroyltriglutamate-homocysteinemethyltransferase [2.1.1.14]            |

## SA reactions

|          |       |                                                                                |                                                            |
|----------|-------|--------------------------------------------------------------------------------|------------------------------------------------------------|
| RN:R0052 | false | 5-O-(1-Carboxyvinyl)-3-PShi = Chor                                             | chorismatesynthase [4.2.3.5]                               |
| RN:R0057 | false | Anthranilate + PRPP = (5-P-D-R)anthranilate                                    | anthranilatephosphoribosyltransferase [2.4.2.18]           |
| RN:R0058 | false | L-Asp + L-Gln = L-Asn + L-Glu                                                  | asparagine synthase [6.3.5.4]                              |
| RN:R0059 | false | L-Asp = 4-P-L-Asp                                                              | asparto kinase II [2.7.2.4]                                |
| RN:R0061 | false | L-Glu + NH <sub>3</sub> = L-Gln                                                | glutamine-ammonialigase [6.3.1.2]                          |
| RN:R0062 | false | L-HomoSer = O-P-L-homoSer                                                      | homoserinekinase [2.7.1.39]                                |
| RN:R0065 | false | Shi = Shi_3-P                                                                  | shikimatekinase(SK) [2.7.1.71]                             |
| RN:R0068 | false | Carbamoyl_P + L-Orn = L-Citrulline                                             | ornithinecarbamoyltransferase [2.1.3.3]                    |
| RN:R0072 | false | Chor + NH <sub>3</sub> = Anthranilate + PYR                                    | anthranilatesynthase [4.1.3.27]                            |
| RN:R0073 | false | Chor = Prephenate                                                              | chorismatemutase [5.4.99.5]                                |
|          |       | D-erythro-1-(Imidazol-4-yl)glycerol_3-P = 3-(Imidazol-4-yl)-2-oxopropyl_P      | imidazoleglycerol-phosphatedehydratase [4.2.1.19]          |
| RN:R0075 | false |                                                                                |                                                            |
| RN:R0089 | false | L-Arg = L-Citrulline + NH <sub>3</sub>                                         | argininedeiminase [3.5.3.6]                                |
| RN:R0090 | false | L-Arg = L-Orn + Urea                                                           | arginase [3.5.3.1]                                         |
| RN:R0093 | false | L-Glu + OAA = AKG + L-Asp                                                      | aspartate transaminase [2.6.1.1]                           |
| RN:R0095 | false | L-Asp_4-semialdehyde + PYR = 23-Dihydrodipicolinate                            | dihydrodipicolinate synthase [4.2.1.52]                    |
| RN:R0100 | true  | L-Glu = D-Glu                                                                  | glutamateracemase [5.1.1.3]                                |
| RN:R0104 | false | L-Histidinol + 2 NAD <sup>+</sup> = L-His + 2 NADH                             | putative histidinoldehydrogenase [1.1.1.23]                |
| RN:R0105 | false | L-Histidinol_P = L-Histidinol                                                  | putative histidinol phosphatase [3.1.3.15]                 |
| RN:R0106 | true  | L-HomoSer + NADP <sup>+</sup> = L-Asp_4-semialdehyde + NADPH                   | homoserine dehydrogenase [1.1.1.3]                         |
| RN:R0112 | false | L-Orn = L-Pro + NH <sub>3</sub>                                                | putative ornithinecyclodeaminase [4.3.1.12]                |
| RN:R0114 | false | Ac-CoA + L-Ser = CoA + O-Ac-L-Ser                                              | serineO-acetyltransferase [2.3.1.30]                       |
| RN:R0116 | false | Indoleglycerol_P + L-Ser = GA_P + L-Try                                        | tryptophan synthase [4.2.1.20]                             |
| RN:R0117 | false | NH <sub>3</sub> + PYR = L-Ser                                                  | thereoninedehydratase [4.3.1.19, 4.3.1.17]                 |
| RN:R0120 | true  | L-Thr = Acetaldehyde + Gly                                                     | putative threoninealdolase [4.1.2.5]                       |
| RN:R0121 | false | L-Thr = 2-Oxobutanoate + NH <sub>3</sub>                                       | thereoninedehydratase [4.3.1.19]                           |
|          |       | Pribulosyl-formimino-AICAR-P = AICAR + D-erythro-1-(Imidazol-4-yl)glycerol_3-P | amidotransferasehisH [2.4.2.-]                             |
| RN:R0125 | false |                                                                                |                                                            |
| RN:R0126 | false | (5-P-D-R)anthranilate = 1-(2-Carboxyphenylamino)-1-deoxy-D-Ru_5-P              | phosphoriborylanthranilateisomerase [5.3.1.24]             |
| RN:R0134 | false | Formimino-L-Glu = Formamide + L-Glu                                            | hypothetical protein,similartoformiminoglutamase [3.5.3.8] |
| RN:R0138 | false | O-P-L-homoSer = L-Thr                                                          | threoninesynthase [4.2.3.1]                                |
| RN:R0141 | false | D-E4P + PEP = DAHP                                                             | phospho-2-dehydro-3-deoxyheptonate aldo [2.5.1.54]         |
| RN:R0142 | false | PEP + Shi_3-P = 5-O-(1-Carboxyvinyl)-3-PShi                                    | 3-phosphoshikimate1-carboxyvinyltransferase [2.5.1.19]     |
| RN:R0143 | false | PR-AMP = PR-formimino-AICAR-P                                                  | histidinebiosynthesisbifunctionalproteinHisIE [3.5.4.19]   |
| RN:R0144 | false | PR-ATP = PR-AMP                                                                | histidinebiosynthesisbifunctionalproteinHisIE [3.6.1.31]   |
| RN:R0145 | false | PRPP = PR-ATP                                                                  | ATPphosphoribosyltransferase [2.4.2.17]                    |
| RN:R0146 | false | NAD <sup>+</sup> + Prephenate = 3-(4-Hydroxyphenyl)PYR + NADH                  | prephenatedehydrogenase [1.3.1.12]                         |
| RN:R0147 | false | Prephenate = PhenylPYR                                                         | prephenate dehydratase [4.2.1.51]                          |

## SA reactions

|          |       |                                                                |                                                                |
|----------|-------|----------------------------------------------------------------|----------------------------------------------------------------|
| RN:R0155 | false | 3-DehydroShi + NADPH = NADP+ + Shi                             | shikimatedehydrogenease [1.1.1.25]                             |
| RN:R0160 | false | Urea = 2 NH3                                                   | urease [3.5.1.5]                                               |
| RN:R0161 | false | Urocanate = 4-Imidazolone-5-propanoate                         | urocanatehydratase [4.2.1.49]                                  |
| RN:R0166 | false | 3-(Imidazol-4-yl)-2-oxopropyl_P + L-Glu = AKG + L-Histidinol_P | putative histidinol-phosphateaminotransferase [2.6.1.9]        |
| RN:R0167 | false | L-Glu + PhenylPYR = AKG + L-PhenylAla                          | putative histidinol-phosphateaminotransferase [2.6.1.9]        |
| RN:R0168 | false | 3-(4-Hydroxyphenyl)PYR + L-Glu = AKG + L-Tyr                   | putative histidinol-phosphatetransaminase [2.6.1.9]            |
| RN:R0179 | false | Acetaldehyde + NAD+ = Ac + NADH                                | aldehyde dehydrogenase [1.2.1.3]                               |
| RN:R0188 | false | DHQ = 3-DehydroShi                                             | enolase [4.2.1.11, 4.2.1.10]                                   |
| RN:R0195 | false | PYR + Thiamin_diP = 2-(A-Hydroxyethyl)thiamine_diP             | pyruvate dehydrogenase_acetolactatesynthase [1.2.4.1, 2.2.1.6] |
| RN:R0198 | false | O-Ac-L-Ser = Ac + L-Cys                                        | cysteinesynthase [2.5.1.47]                                    |
| RN:R0208 | false | NH3 = Carbamoyl_P                                              | carbamatekinase [2.7.2.2]                                      |
| RN:R0209 | false | D-Ala = L-Ala                                                  | alanineracemase [5.1.1.1]                                      |
| RN:R0238 | false | GA_P + NAD+ = 3-P-D-glyceroyl_P + NADH                         | glyceraldehyde-3-phosphate dehydrogenase [1.2.1.12]            |
| RN:R0239 | false | Glycerone_P = GA_P                                             | triosephosphate isomerase [5.3.1.1]                            |
| RN:R0243 | false | Mal + Menaquinone = Menaquinol + OAA                           | malate:quinoneoxidoreductase [1.1.99.16]                       |
| RN:R0245 | true  | Mal + NAD+ = NADH + PYR                                        | malatedehydrogenase homolog [1.1.1.38]                         |
| RN:R0246 | false | Fum = Mal                                                      | fumarate hydratase, class-II [4.2.1.2]                         |
| RN:R0255 | false | 3-P-D-GA = 2-P-D-GA                                            | phosphoglycerate mutase [5.4.2.1]                              |
| RN:R0256 | false | 2-P-D-GA = PEP                                                 | enolase [4.2.1.11]                                             |
| RN:R0260 | false | 6PGlucon + NADP+ = D-Ru_5-P + NADPH                            | phosphogluconate dehydrogenase [1.1.1.44]                      |
| RN:R0267 | false | Ac-CoA + OAA = Cit + CoA                                       | citrate synthase [2.3.3.1]                                     |
| RN:R0269 | false | PEP = PYR                                                      | pyruvate kinase [2.7.1.40]                                     |
| RN:R0270 | false | 3-P-D-glyceroyl_P = 3-P-D-GA                                   | phosphoglycerate kinase [2.7.2.3]                              |
| RN:R0271 | false | Ac + CoA = Ac-CoA                                              | acetyl-CoA synthetase AND ligase [6.2.1.1]                     |
| RN:R0274 | false | D-F = D-F_6-P                                                  | fructokinase, putative [2.7.1.4]                               |
| RN:R0276 | false | D-F_6-P = D-F_16-BP                                            | 6-phosphofructokinase [2.7.1.11]                               |
| RN:R0280 | false | D-Ri_5-P = PRPP                                                | ribose-phosphate pyrophosphokinase [2.7.6.1]                   |
| RN:R0284 | false | OAA = PEP                                                      | phosphoenolpyruvate carboxykinase [4.1.1.49]                   |
| RN:R0287 | false | PYR = OAA                                                      | pyruvate carboxylase [6.4.1.1]                                 |
| RN:R0288 | true  | CoA + Succ = SuccCoA                                           | succinyl-CoA synthetase [6.2.1.5]                              |
| RN:R0294 | false | D-F_16-BP = D-F_6-P                                            | fructose-bisphosphatase [3.1.3.11]                             |
| RN:R0295 | true  | D-F_6-P + GA_P = D-E4P + D-Xu_5-P                              | transketolase [2.2.1.1]                                        |
| RN:R0297 | false | D-Glucono-15-lactone_6-P = 6PGlucon                            | Spon_PGLactonohydrolase [3.1.1.31]                             |
| RN:R0301 | false | D-G_6-P + NADP+ = D-Glucono-15-lactone_6-P + NADPH             | glucose-6-phosphate 1-dehydrogenase [1.1.1.49]                 |
| RN:R0302 | false | D-G_6-P = D-F_6-P                                              | glucose-6-phosphate isomerase A [5.3.1.9]                      |
| RN:R0311 | false | D-Ru_5-P = D-Ri_5-P                                            | ribose 5-phosphate isomerase A [5.3.1.6]                       |
| RN:R0314 | false | D-Ru_5-P = D-Xu_5-P                                            | ribulose-phosphate 3-epimerase [5.1.3.1]                       |
| RN:R0315 | true  | D-S7P + GA_P = D-E4P + D-F_6-P                                 | Transaldolase superfamily [2.2.1.2]                            |

## SA reactions

|          |       |                                                                                                                                             |                                                                  |
|----------|-------|---------------------------------------------------------------------------------------------------------------------------------------------|------------------------------------------------------------------|
| RN:R0316 | true  | $D\text{-S7P} + GA\_P = D\text{-Ri\_5-P} + D\text{-Xu\_5-P}$                                                                                | transketolase [2.2.1.1]                                          |
| RN:R0324 | false | $IsoCit + NADP^+ = NADPH + OASucc$                                                                                                          | isocitrate dehydrogenase [1.1.1.42]                              |
| RN:R0335 | false | $OASucc = AKG$                                                                                                                              | isocitrate dehydrogenase [1.1.1.42]                              |
| RN:R0345 | false | $FAD + Succ = FADH_2 + Fum$                                                                                                                 | succinate dehydrogenase [1.3.99.1]                               |
| RN:R0348 | false | $Sucrose\_6\text{-P} = D\text{-F} + D\text{-G\_6-P}$                                                                                        | sucrose-6-phosphatehydrolase [3.2.1.26]                          |
| RN:R0358 | false | $cis\text{-Acon} = IsoCit$                                                                                                                  | aconitate hydratase [4.2.1.3]                                    |
| RN:R0359 | false | $Cit = cis\text{-Acon}$                                                                                                                     | aconitate hydratase [4.2.1.3]                                    |
| RN:R0360 | false | $D\text{-F\_16-BP} = GA\_P + Glycerone\_P$                                                                                                  | fructose-bisphosphate aldolase [4.1.2.13]                        |
| RN:R0372 | false | $AKG + L\text{-Gln} + NADPH = 2\ L\text{-Glu} + NADP^+$                                                                                     | glutamatesynthase [1.4.1.13]                                     |
| RN:R0384 | false | $L\text{-His} = NH_3 + Urocanate$                                                                                                           | histidineammonia-lyase [4.3.1.3]                                 |
| RN:R0522 | true  | $NH_3(ex) = NH_3$                                                                                                                           | probabale ammonium transporter [2.A.49]                          |
| RN:R0534 | false | $D\text{-G}(ex) + PEP = D\text{-G\_6-P} + PYR$                                                                                              | glucose-specific PTS [2.7.1.69, 2.7.3.9]                         |
| RN:R0673 | true  | $AKG + D\text{-Ala} = D\text{-Glu} + PYR$                                                                                                   | D-alanineaminotransferase [2.6.1.21]                             |
| RN:R0986 | false | $2\ L\text{-Glu} + NADH = AKG + L\text{-Orn} + NAD^+$                                                                                       | EZComp_UreaOrnSyn [1.5.1.12, 2.6.1.13]                           |
| RN:R0987 | false | $2345\text{-Tetrahydrodipicolinate} + L\text{-Glu} + SuccCoA = AKG + CoA + L\text{-Lys} + Succ$                                             | EZComp_LysSyn [2.3.1.117, 2.6.1.17, 3.5.1.18, 5.1.1.7, 4.1.1.20] |
| RN:R0988 | false | $AKG + CoA + NAD^+ = NADH + SuccCoA$                                                                                                        | EZComp_TCASuccinyl [1.2.4.2, 2.3.1.61, 1.8.1.4]                  |
| RN:R0989 | false | $2\text{-}(A\text{-Hydroxyethyl})thiamine\_diP + 2\text{-Oxobutanoate} + L\text{-Glu} + NADPH = AKG + L\text{-Ile} + NADP^+ + Thiamin\_diP$ | EZComp_Ile_Meta [2.2.1.6, 1.1.1.86, 4.2.1.9, 2.6.1.42]           |
| RN:R0990 | false | $2\text{-}(A\text{-Hydroxyethyl})thiamine\_diP + NADPH + PYR = 3\text{-Methyl-2-ox-obutanoate} + NADP^+ + Thiamin\_diP$                     | EZComp_Val_Meta [2.2.1.6, 1.1.1.86, 4.2.1.9]                     |
| RN:R0991 | false | $3\text{-Methyl-2-oxobutanoate} + Ac\text{-CoA} + L\text{-Glu} + NAD^+ = AKG + CoA + L\text{-Leu} + NADH$                                   | EZComp_Leu_Meta [2.3.3.13, 4.2.1.33, 1.1.1.85, 2.6.1.42]         |
| RN:R0993 | false | $L\text{-Asp} + L\text{-Citrulline} = Fum + L\text{-Arg}$                                                                                   | EZComp_Fum_Asp [4.3.2.1, 6.3.4.5]                                |
| RN:R0994 | false | $CoA + NAD^+ + PYR = Ac\text{-CoA} + NADH$                                                                                                  | EZComp_PyrAcetylCoA [1.2.4.1, 2.3.1.12, 1.8.1.4]                 |
| RN:R0995 | false | $Gly + NAD^+ + THF = 510\text{-MethyleneTHF} + NADH + NH_3$                                                                                 | EZComp_GlySerThrMeta [2.1.2.10, 1.8.1.4, 1.4.4.2]                |
| RN:R0996 | false | $Ac\text{-CoA} + L\text{-Cys} + L\text{-HomoSer} = Ac + CoA + L\text{-HomoCys} + NH_3 + PYR$                                                | EZComp_MetMeta [2.3.1.31, 2.5.1.48, 4.4.1.8]                     |
| RN:R0997 | false | $AKG + L\text{-Orn} + NADH + 2\ NADPH = 2\ L\text{-Pro} + NAD^+ + 2\ NADP^+$                                                                | EZComp_UreaMeta [1.5.1.2, 1.5.1.12, 2.6.1.13]                    |

**Table 12: *S. aureus* network - Elementary Modes discussed in the results section<sup>1</sup>**

| #  | Flux | sum Rev. <sup>2</sup> | Length | Reactions <sup>3</sup>                                                                                                                                                                                                                                                                                                                                                                                                                                                                              | Net reaction                                                                                                              |
|----|------|-----------------------|--------|-----------------------------------------------------------------------------------------------------------------------------------------------------------------------------------------------------------------------------------------------------------------------------------------------------------------------------------------------------------------------------------------------------------------------------------------------------------------------------------------------------|---------------------------------------------------------------------------------------------------------------------------|
| 3  | 25   | false                 | 16     | (1 RN:Nucl02) (2 RN:R0061) (2 RN:R0089) (2 RN:R0093) (2 RN:R0245) (2 RN:R0246) (1 RN:R0260) (1 RN:R0280) (1 RN:R0284) (3 RN:R0287) (1 RN:R0297) (1 RN:R0301) (1 RN:R0311) (2 RN:R0372) (1 RN:R0534) (2 RN:R0993)                                                                                                                                                                                                                                                                                    | D-G(ex) + 2 NAD <sup>+</sup> = 2 NADH + Pyrimidine(ex)                                                                    |
| 19 | 428  | false                 | 35     | (5 RN:E0001) (11 RN:E0019) (5 RN:R0021) (11 RN:R0038) (5 RN:R0052) (16 RN:R0061) (5 RN:R0065) (5 RN:R0073) (5 RN:R0141) (5 RN:R0142) (5 RN:R0147) (5 RN:R0155) (5 RN:R0167) (5 RN:R0188) (11 RN:R0195) (32 RN:R0238) (15 RN:R0239) (32 RN:R0255) (32 RN:R0256) (16 RN:R0260) (32 RN:R0270) (15 RN:R0276) (-2 RN:R0295) (16 RN:R0297) (16 RN:R0301) (6 RN:R0302) (7 RN:R0311) (9 RN:R0314) (7 RN:R0315) (-7 RN:R0316) (15 RN:R0360) (16 RN:R0372) (16 RN:R0522) (22 RN:R0534) (11 RN:R0990)          | 22 D-G(ex) + 32 NAD <sup>+</sup> + 16 NH <sub>3</sub> (ex) = 32 NADH + 5 Phe-tRNA(ex) + 11 Val-tRNA(ex)                   |
| 21 | 239  | false                 | 36     | (3 RN:E0001) (11 RN:E0009) (3 RN:R0021) (3 RN:R0052) (3 RN:R0061) (3 RN:R0065) (3 RN:R0073) (11 RN:R0114) (11 RN:R0117) (3 RN:R0141) (3 RN:R0142) (3 RN:R0147) (3 RN:R0155) (3 RN:R0167) (3 RN:R0188) (11 RN:R0198) (17 RN:R0238) (9 RN:R0239) (17 RN:R0255) (17 RN:R0256) (3 RN:R0260) (17 RN:R0270) (11 RN:R0271) (9 RN:R0276) (1 RN:R0295) (3 RN:R0297) (3 RN:R0301) (8 RN:R0302) (2 RN:R0311) (1 RN:R0314) (2 RN:R0315) (-2 RN:R0316) (9 RN:R0360) (3 RN:R0372) (14 RN:R0522) (11 RN:R0534)     | 11 D-G(ex) + 17 NAD <sup>+</sup> + 14 NH <sub>3</sub> (ex) = 11 Cys-tRNA(ex) + 17 NADH + 3 Phe-tRNA(ex)                   |
| 81 | 289  | false                 | 36     | (5 RN:E0013) (5 RN:E0018) (6 RN:Nucl02) (5 RN:R0047) (5 RN:R0059) (15 RN:R0061) (5 RN:R0062) (5 RN:R0093) (5 RN:R0100) (-5 RN:R0106) (5 RN:R0121) (5 RN:R0138) (5 RN:R0195) (5 RN:R0209) (15 RN:R0238) (6 RN:R0239) (15 RN:R0255) (15 RN:R0256) (15 RN:R0260) (15 RN:R0270) (6 RN:R0276) (6 RN:R0280) (5 RN:R0287) (-3 RN:R0295) (15 RN:R0297) (15 RN:R0301) (9 RN:R0311) (6 RN:R0314) (3 RN:R0315) (-3 RN:R0316) (6 RN:R0360) (15 RN:R0372) (10 RN:R0522) (15 RN:R0534) (-5 RN:R0673) (5 RN:R0989) | 15 D-G(ex) + 15 NAD <sup>+</sup> + 10 NH <sub>3</sub> (ex) = 5 Ala-tRNA(ex) + 5 Ile-tRNA(ex) + 15 NADH + 6 Pyrimidine(ex) |

## SA EMs

|     |     |       |    |                                                                                                                                                                                                                                                                                                                                                                                                                                                                                                                                                                                                               |                                                                                                                          |
|-----|-----|-------|----|---------------------------------------------------------------------------------------------------------------------------------------------------------------------------------------------------------------------------------------------------------------------------------------------------------------------------------------------------------------------------------------------------------------------------------------------------------------------------------------------------------------------------------------------------------------------------------------------------------------|--------------------------------------------------------------------------------------------------------------------------|
|     |     |       |    | (13 RN:E0001) (10 RN:E0018) (13 RN:R0021) (10 RN:R0047) (13 RN:R0052) (10 RN:R0059) (33 RN:R0061) (10 RN:R0062) (13 RN:R0065) (13 RN:R0073) (10 RN:R0093) (-10 RN:R0106) (10 RN:R0121) (10 RN:R0138) (13 RN:R0141) (13 RN:R0142) (13 RN:R0147) (13 RN:R0155) (13 RN:R0167) (13 RN:R0188) (10 RN:R0195) (46 RN:R0238) (21 RN:R0239) (46 RN:R0255) (46 RN:R0256) (38 RN:R0260) (46 RN:R0270) (21 RN:R0276) (18 RN:R0284) (28 RN:R0287) (-4 RN:R0295) (38 RN:R0297) (38 RN:R0301) (17 RN:R0311) (21 RN:R0314) (17 RN:R0315) (-17 RN:R0316) (21 RN:R0360) (33 RN:R0372) (23 RN:R0522) (38 RN:R0534) (10 RN:R0989) | 38 D-G(ex) + 46 NAD <sup>+</sup> + 23 NH <sub>3</sub> (ex) = 10 Ile-tRNA(ex) + 46 NADH + 13 Phe-tRNA(ex)                 |
| 91  | 853 | false | 42 | (3 RN:E0001) (2 RN:E0006) (10 RN:E0008) (3 RN:R0021) (2 RN:R0047) (3 RN:R0052) (2 RN:R0059) (5 RN:R0061) (2 RN:R0062) (3 RN:R0065) (3 RN:R0073) (2 RN:R0093) (-2 RN:R0106) (10 RN:R0117) (2 RN:R0138) (3 RN:R0141) (3 RN:R0142) (3 RN:R0147) (3 RN:R0155) (3 RN:R0167) (3 RN:R0188) (18 RN:R0238) (9 RN:R0239) (18 RN:R0255) (18 RN:R0256) (6 RN:R0260) (18 RN:R0270) (9 RN:R0276) (2 RN:R0287) (6 RN:R0297) (6 RN:R0301) (6 RN:R0302) (3 RN:R0311) (3 RN:R0314) (3 RN:R0315) (-3 RN:R0316) (9 RN:R0360) (5 RN:R0372) (15 RN:R0522) (12 RN:R0534)                                                             | 12 D-G(ex) + 18 NAD <sup>+</sup> + 15 NH <sub>3</sub> (ex) = 18 NADH + 3 Phe-tRNA(ex) + 10 Ser-tRNA(ex) + 2 Thr-tRNA(ex) |
| 100 | 241 | false | 40 |                                                                                                                                                                                                                                                                                                                                                                                                                                                                                                                                                                                                               |                                                                                                                          |

<sup>1</sup> complete list available from the authors on request

<sup>2</sup> reversible

<sup>3</sup> reaction identifiers are taken from KEGG, for annotations see the reaction table

**Table 13: *S. epidermidis* network - metabolites**

| Name                                      | internal? | Connectivity | Description                                             |
|-------------------------------------------|-----------|--------------|---------------------------------------------------------|
| (5-P-D-R)anthranilate                     | true      | 2            | N-(5-Phospho-D-ribosyl)anthranilate                     |
| 1-(2-Carboxyphenylamino)-1-deoxy-D-Ru_5-P | true      | 2            | 1-(2-Carboxyphenylamino)-1-deoxy-D-ribulose_5-phosphate |
| 2-(A-Hydroxyethyl)thiamine_diP            | true      | 3            | 2-(alpha-Hydroxyethyl)thiamine_diphosphate              |
| 2-Oxobutanoate                            | true      | 2            | 2-Oxobutanoate                                          |
| 2-P-D-GA                                  | true      | 2            | 2-Phospho-D-glycerate                                   |
| 23-Dihydrodipicolinate                    | true      | 2            | 2,3-Dihydrodipicolinate                                 |
| 2345-Tetrahydrodipicolinate               | true      | 2            | 2,3,4,5-Tetrahydrodipicolinate                          |
| 3-(4-Hydroxyphenyl)PYR                    | true      | 2            | 3-(4-Hydroxyphenyl)pyruvate                             |
| 3-(Imidazol-4-yl)-2-oxopropyl_P           | true      | 2            | 3-(Imidazol-4-yl)-2-oxopropyl_phosphate                 |
| 3-DehydroShi                              | true      | 2            | 3-Dehydroshikimate                                      |
| 3-Methyl-2-oxobutanoate                   | true      | 3            | 3-Methyl-2-oxobutanoate                                 |
| 3-P-D-GA                                  | true      | 2            | 3-Phospho-D-glycerate                                   |
| 3-P-D-glyceroyl_P                         | true      | 2            | 3-Phospho-D-glyceroyl_phosphate                         |
| 4-Imidazolone-5-propanoate                | true      | 1            | 4-Imidazolone-5-propanoate                              |
| 4-P-L-Asp                                 | true      | 2            | 4-Phospho-L-aspartate                                   |
| 5-O-(1-Carboxyvinyl)-3-PShi               | true      | 2            | 5-O-(1-Carboxyvinyl)-3-phosphoshikimate                 |
| 510-MethyleneTHF                          | true      | 2            | 5,10-Methylenetetrahydrofolate                          |
| 6PGlucon                                  | true      | 2            | 6-Phospho-D-gluconate                                   |
| Ac                                        | true      | 4            | Acetate                                                 |
| Ac-CoA                                    | true      | 6            | Acetyl-CoA                                              |
| Acetaldehyde                              | true      | 2            | Acetaldehyde                                            |
| AICAR                                     | true      | 2            | 1-(5-Phosphoribosyl)-5-amino-4-imidazolecarboxamide     |
| AKG                                       | true      | 15           | 2-Oxoglutarate                                          |
| Ala-tRNA(ex)                              | false     | 1            | Ala-tRNA(ex)                                            |
| Anthranilate                              | true      | 2            | Anthranilate                                            |
| Arg-tRNA(ex)                              | false     | 1            | Arg-tRNA(ex)                                            |
| Asn-tRNA(ex)                              | false     | 1            | Asn-tRNA(ex)                                            |
| Asp-tRNA(ex)                              | false     | 1            | Asp-tRNA(ex)                                            |
| Carbamoyl_P                               | true      | 3            | Carbamoyl_phosphate                                     |
| Chor                                      | true      | 3            | Chorismate                                              |
| cis-Acon                                  | true      | 2            | cis-Aconitate                                           |
| Cit                                       | true      | 2            | Citrate                                                 |
| CoA                                       | true      | 9            | CoA                                                     |
| Cys-tRNA(ex)                              | false     | 1            | Cys-tRNA(ex)                                            |
| D-Ala                                     | true      | 2            | D-Alanine                                               |
| D-E4P                                     | true      | 3            | D-Erythrose_4-phosphate                                 |
| D-erythro-1-(Imidazol-4-yl)glycerol_3-P   | true      | 2            | D-erythro-1-(Imidazol-4-yl)glycerol_3-phosphate         |

SEP metabolites

|                          |       |    |                                                   |
|--------------------------|-------|----|---------------------------------------------------|
| D-F                      | true  | 2  | D-Fructose                                        |
| D-F_16-BP                | true  | 3  | D-Fructose_1,6-bisphosphate                       |
| D-F_6-P                  | true  | 6  | D-Fructose_6-phosphate                            |
| D-G(ex)                  | false | 1  | D-Glucose(ex)                                     |
| D-G_6-P                  | true  | 4  | D-Glucose_6-phosphate                             |
| D-Glu                    | true  | 2  | D-Glutamate                                       |
| D-Glucono-15-lactone_6-P | true  | 2  | D-Glucono-1,5-lactone_6-phosphate                 |
| D-Ri_5-P                 | true  | 3  | D-Ribose_5-phosphate                              |
| D-Ru_5-P                 | true  | 3  | D-Ribulose_5-phosphate                            |
| D-S7P                    | true  | 2  | D-Sedoheptulose_7-phosphate                       |
| D-Xu_5-P                 | true  | 3  | D-Xylulose_5-phosphate                            |
| DAHP                     | true  | 2  | 2-Dehydro-3-deoxy-D-arabino-heptonate_7-phosphate |
| DHQ                      | true  | 2  | 3-Dehydroquinate                                  |
| FAD(ex)                  | false | 1  | FAD                                               |
| FADH2(ex)                | false | 1  | FADH2                                             |
| Formamide                | true  | 1  | Formamide                                         |
| Formimino-L-Glu          | true  | 2  | N-Formimino-L-glutamate                           |
| Fum                      | true  | 3  | Fumarate                                          |
| GA_P                     | true  | 7  | (2R)-2-Hydroxy-3-(phosphonoxy)-propanal           |
| Gln-tRNA(ex)             | false | 1  | Gln-tRNA(ex)                                      |
| Glu-tRNA(ex)             | false | 1  | Glu-tRNA(ex)                                      |
| Gly                      | true  | 4  | Glycine                                           |
| Gly-tRNA(ex)             | false | 1  | Gly-tRNA(ex)                                      |
| Glycerone_P              | true  | 2  | Glycerone_phosphate                               |
| His-tRNA(ex)             | false | 1  | His-tRNA(ex)                                      |
| Ile-tRNA(ex)             | false | 1  | Ile-tRNA(ex)                                      |
| Indoleglycerol_P         | true  | 2  | Indoleglycerol_phosphate                          |
| IsoCit                   | true  | 2  | Isocitrate                                        |
| L-Ala                    | true  | 2  | L-Alanine                                         |
| L-Arg                    | true  | 3  | L-Arginine                                        |
| L-Asn                    | true  | 2  | L-Asparagine                                      |
| L-Asp                    | true  | 5  | L-Aspartate                                       |
| L-Asp_4-semialdehyde     | true  | 3  | L-Aspartate_4-semialdehyde                        |
| L-Citrulline             | true  | 3  | L-Citrulline                                      |
| L-Cys                    | true  | 3  | L-Cysteine                                        |
| L-Gln                    | true  | 5  | L-Glutamine                                       |
| L-Glu                    | true  | 18 | L-Glutamate                                       |
| L-Glu_5-semialdehyde     | true  | 2  | L-Glutamate_5-semialdehyde                        |
| L-His                    | true  | 2  | L-Histidine                                       |
| L-Histidinol             | true  | 2  | L-Histidinol                                      |



## SEP metabolites

|                              |       |    |                                                                                             |
|------------------------------|-------|----|---------------------------------------------------------------------------------------------|
| L-Histidinol_P               | true  | 2  | L-Histidinol_phosphate                                                                      |
| L-HomoCys                    | true  | 2  | L-Homocysteine                                                                              |
| L-HomoSer                    | true  | 3  | L-Homoserine                                                                                |
| L-Ile                        | true  | 2  | L-Isoleucine                                                                                |
| L-Leu                        | true  | 2  | L-Leucine                                                                                   |
| L-Lys                        | true  | 2  | L-Lysine                                                                                    |
| L-Met                        | true  | 2  | L-Methionine                                                                                |
| L-Orn                        | true  | 5  | L-Ornithine                                                                                 |
| L-PhenylAla                  | true  | 2  | L-Phenylalanine                                                                             |
| L-Pro                        | true  | 3  | L-Proline                                                                                   |
| L-Ser                        | true  | 5  | L-Serine                                                                                    |
| L-Thr                        | true  | 4  | L-Threonine                                                                                 |
| L-Try                        | true  | 2  | L-Tryptophane                                                                               |
| L-Tyr                        | true  | 2  | L-Tyrosine                                                                                  |
| L-Val                        | true  | 2  | L-Valine                                                                                    |
| Leu-tRNA(ex)                 | false | 1  | Leu-tRNA(ex)                                                                                |
| Lys-tRNA(ex)                 | false | 1  | Lys-tRNA(ex)                                                                                |
| Mal                          | true  | 4  | (S)-Malate                                                                                  |
| Menaquinol                   | true  | 1  | Menaquinol                                                                                  |
| Menaquinone                  | true  | 1  | Menaquinone                                                                                 |
| Met-tRNA(ex)                 | false | 1  | Met-tRNA(ex)                                                                                |
| NAD+                         | false | 13 | NAD+                                                                                        |
| NADH                         | false | 13 | NADH                                                                                        |
| NADP+                        | true  | 11 | NADP+                                                                                       |
| NADPH                        | true  | 11 | NADPH                                                                                       |
| NH3                          | true  | 11 | NH3                                                                                         |
| NH3(ex)                      | false | 1  | NH3(ex)                                                                                     |
| O-Ac-L-Ser                   | true  | 2  | O-Acetyl-L-serine                                                                           |
| O-P-L-homoSer                | true  | 2  | O-Phospho-L-homoserine                                                                      |
| OAA                          | true  | 6  | Oxaloacetate                                                                                |
| OASucc                       | true  | 2  | Oxalosuccinate                                                                              |
| PEP                          | true  | 6  | Phosphoenolpyruvate                                                                         |
| Phe-tRNA(ex)                 | false | 1  | Phe-tRNA(ex)                                                                                |
| PhenylPYR                    | true  | 2  | Phenylpyruvate                                                                              |
| PR-AMP                       | true  | 2  | Phosphoribosyl-AMP                                                                          |
| PR-ATP                       | true  | 2  | Phosphoribosyl-ATP                                                                          |
| PR-formimino-AICAR-P         | true  | 2  | 5-(5-Phospho-D-ribosylaminoformimino)-1-(5-phosphoribosyl)-imidazole-4-carboxamide          |
| Prephenate                   | true  | 3  | Prephenate                                                                                  |
| Pribulosyl-formimino-AICAR-P | true  | 2  | N-(5-Phospho-D-1-ribulosylformimino)-5-amino-1-(5-phospho-D-ribosyl)-4-imidazolecarboxamide |
| Pro-tRNA(ex)                 | false | 1  | Pro-tRNA(ex)                                                                                |

SEP metabolites

|                |       |    |                                  |
|----------------|-------|----|----------------------------------|
| PRPP           | true  | 4  | 5-Phospho-D-ribose_1-diphosphate |
| Purine(ex)     | false | 1  | Purine(ex)                       |
| PYR            | true  | 12 | Pyruvate                         |
| Pyrimidine(ex) | false | 1  | Pyrimidine(ex)                   |
| Ser-tRNA(ex)   | false | 1  | Ser-tRNA(ex)                     |
| Shi            | true  | 2  | Shikimate                        |
| Shi_3-P        | true  | 2  | Shikimate_3-phosphate            |
| Succ           | true  | 3  | Succinate                        |
| SuccCoA        | true  | 3  | Succinyl-CoA                     |
| Sucrose_6-P    | true  | 1  | Sucrose_6-phosphate              |
| THF            | true  | 2  | Tetrahydrofolate                 |
| Thiamin_diP    | true  | 3  | Thiamin_diphosphate              |
| Thr-tRNA(ex)   | false | 1  | Thr-tRNA(ex)                     |
| Try-tRNA(ex)   | false | 1  | Try-tRNA(ex)                     |
| Tyr-tRNA(ex)   | false | 1  | Tyr-tRNA(ex)                     |
| Urea           | true  | 1  | Urea                             |
| Val-tRNA(ex)   | false | 1  | Val-tRNA(ex)                     |

**Table 14: *S. epidermidis* network - reactions**

| Enzyme name | rev.? | Reaction equation                                                    | Annotation                                                                               |
|-------------|-------|----------------------------------------------------------------------|------------------------------------------------------------------------------------------|
| rn:E0001    | false | L-PhenylAla = Phe-tRNA(ex)                                           | PheX [6.1.1.20]                                                                          |
| rn:E0002    | false | L-Tyr = Tyr-tRNA(ex)                                                 | TyrX [6.1.1.1]                                                                           |
| rn:E0003    | false | L-Try = Try-tRNA(ex)                                                 | TryX [6.1.1.-]                                                                           |
| rn:E0004    | false | L-His = His-tRNA(ex)                                                 | HisX [6.1.1.21]                                                                          |
| rn:E0005    | false | L-Met = Met-tRNA(ex)                                                 | MetX [6.1.1.10]                                                                          |
| rn:E0006    | false | L-Thr = Thr-tRNA(ex)                                                 | ThrX [6.1.1.3]                                                                           |
| rn:E0007    | false | Gly = Gly-tRNA(ex)                                                   | GlyX [6.1.1.14]                                                                          |
| rn:E0008    | false | L-Ser = Ser-tRNA(ex)                                                 | SerX [6.1.1.11]                                                                          |
| rn:E0009    | false | L-Cys = Cys-tRNA(ex)                                                 | CysX [6.1.1.16]                                                                          |
| rn:E0010    | false | L-Lys = Lys-tRNA(ex)                                                 | LysX [6.1.1.6]                                                                           |
| rn:E0011    | false | L-Asn = Asn-tRNA(ex)                                                 | AsnX [6.1.1.22]                                                                          |
| rn:E0012    | false | L-Asp = Asp-tRNA(ex)                                                 | AspX [6.1.1.12]                                                                          |
| rn:E0013    | false | L-Ala = Ala-tRNA(ex)                                                 | AlaX [6.1.1.7]                                                                           |
| rn:E0014    | false | L-Pro = Pro-tRNA(ex)                                                 | ProX [6.1.1.15]                                                                          |
| rn:E0015    | false | L-Arg = Arg-tRNA(ex)                                                 | ArgX [6.1.1.19]                                                                          |
| rn:E0016    | false | L-Glu = Glu-tRNA(ex)                                                 | GluX [6.1.1.17]                                                                          |
| rn:E0017    | false | L-Gln = Gln-tRNA(ex)                                                 | GlnX [6.1.1.17]                                                                          |
| rn:E0018    | false | L-Ile = Ile-tRNA(ex)                                                 | IleX [6.1.1.5]                                                                           |
| rn:E0019    | false | L-Val = Val-tRNA(ex)                                                 | ValX [6.1.1.9]                                                                           |
| rn:E0020    | false | L-Leu = Leu-tRNA(ex)                                                 | LeuX [6.1.1.4]                                                                           |
| rn:N01      | false | AICAR = Purine(ex)                                                   | PurineMeta []                                                                            |
| rn:N02      | false | PRPP = Pyrimidine(ex)                                                | PyrimidineMeta []                                                                        |
| rn:U0015    | false | 1-(2-Carboxyphenylamino)-1-deoxy-D-Ru_5-P = Indoleglycerol_P         | indole-3-glycerolphosphatesynthase [4.1.1.48]                                            |
| rn:U0018    | false | L-Gln = Carbamoyl_P + L-Glu                                          | carbamoyl-phosphatesynthase [6.3.5.5]                                                    |
| rn:U0020    | false | 23-Dihydrodipicolinate + NADPH = 2345-Tetrahydrodipicolinate + NADP+ | dihydrodipicolinate reductase [1.3.1.26]                                                 |
| rn:U0021    | false | DAHP = DHQ                                                           | 3-dehydroquinate synthase [4.2.3.4]                                                      |
| rn:U0038    | false | 3-Methyl-2-oxobutanoate + L-Glu = AKG + L-Val                        | branched-chain amino acid aminotransferase [2.6.1.42]                                    |
| rn:U0045    | false | 4-Imidazolone-5-propanoate = Formimino-L-Glu                         | imidazolone propionase [3.5.2.7]                                                         |
| rn:U0047    | false | 4-P-L-Asp + NADPH = L-Asp_4-semialdehyde + NADP+                     | aspartate semialdehyde dehydrogenase [1.2.1.11]                                          |
| rn:U0048    | false | PR-formimino-AICAR-P = Pribulosyl-formimino-AICAR-P                  | putative phosphoribosylformimino-5-aminoimidazolecarboxamide ribotidesomerase [5.3.1.16] |
| rn:U0049    | false | 510-MethyleneTHF + Gly = L-Ser + THF                                 | serine hydroxymethyltransferase [2.1.2.1]                                                |
| rn:U0050    | false | L-HomoCys = L-Met                                                    | 5-methyltetrahydropteroyltriglutamate-homocysteine methyltransferase [2.1.1.14]          |

SEP reactions

|          |       |                                                                                |                                                            |
|----------|-------|--------------------------------------------------------------------------------|------------------------------------------------------------|
| rn:U0052 | false | 5-O-(1-Carboxyvinyl)-3-PShi = Chor                                             | chorismatesynthase [4.2.3.5]                               |
| rn:U0057 | false | Anthranilate + PRPP = (5-P-D-R)anthranilate                                    | anthranilatephosphoribosyltransferase [2.4.2.18]           |
| rn:U0058 | false | L-Asp + L-Gln = L-Asn + L-Glu                                                  | asparagine synthase [6.3.5.4]                              |
| rn:U0059 | false | L-Asp = 4-P-L-Asp                                                              | asparto kinase II [2.7.2.4]                                |
| rn:U0061 | false | L-Glu + NH <sub>3</sub> = L-Gln                                                | glutamine-ammonialigase [6.3.1.2]                          |
| rn:U0062 | false | L-HomoSer = O-P-L-homoSer                                                      | homoserinekinase [2.7.1.39]                                |
| rn:U0065 | false | Shi = Shi_3-P                                                                  | shikimatekinase(SK) [2.7.1.71]                             |
| rn:U0068 | false | Carbamoyl_P + L-Orn = L-Citrulline                                             | ornithinecarbamoyltransferase [2.1.3.3]                    |
| rn:U0072 | false | Chor + NH <sub>3</sub> = Anthranilate + PYR                                    | anthranilatesynthase [4.1.3.27]                            |
| rn:U0073 | false | Chor = Prephenate                                                              | chorismatemutase [5.4.99.5]                                |
|          |       | D-erythro-1-(Imidazol-4-yl)glycerol_3-P = 3-(Imidazol-4-yl)-2-oxopropyl_P      | imidazoleglycerol-phosphatedehydratase [4.2.1.19]          |
| rn:U0075 | false |                                                                                |                                                            |
| rn:U0089 | false | L-Arg = L-Citrulline + NH <sub>3</sub>                                         | argininedeiminase [3.5.3.6]                                |
| rn:U0093 | false | L-Glu + OAA = AKG + L-Asp                                                      | aspartate transaminase [2.6.1.1]                           |
| rn:U0095 | false | L-Asp_4-semialdehyde + PYR = 2,3-Dihydrodipicolinate                           | dihydrodipicolinate synthase [4.2.1.52]                    |
| rn:U0100 | true  | L-Glu = D-Glu                                                                  | glutamateracemase [5.1.1.3]                                |
| rn:U0101 | true  | L-Glu_5-semialdehyde + NAD <sup>+</sup> = L-Glu + NADH                         | 1-pyrroline-5-carboxylatedehydrogenase [1.5.1.12]          |
| rn:U0104 | false | L-Histidinol + 2 NAD <sup>+</sup> = L-His + 2 NADH                             | putative histidinoldehydrogenase [1.1.1.23]                |
| rn:U0105 | false | L-Histidinol_P = L-Histidinol                                                  | putative histidinol phosphatase [3.1.3.15]                 |
| rn:U0106 | true  | L-HomoSer + NADP <sup>+</sup> = L-Asp_4-semialdehyde + NADPH                   | homoserine dehydrogenase [1.1.1.3]                         |
| rn:U0111 | true  | AKG + L-Orn = L-Glu + L-Glu_5-semialdehyde                                     | ornithineaminotransferase [2.6.1.13]                       |
| rn:U0112 | false | L-Orn = L-Pro + NH <sub>3</sub>                                                | putative ornithinecyclodeaminase [4.3.1.12]                |
| rn:U0114 | false | Ac-CoA + L-Ser = CoA + O-Ac-L-Ser                                              | serineO-acetyltransferase [2.3.1.30]                       |
| rn:U0116 | false | Indoleglycerol_P + L-Ser = GA_P + L-Try                                        | tryptophan synthase [4.2.1.20]                             |
| rn:U0117 | false | NH <sub>3</sub> + PYR = L-Ser                                                  | thereoninedehydratase [4.3.1.19, 4.3.1.17]                 |
| rn:U0120 | true  | L-Thr = Acetaldehyde + Gly                                                     | putative threoninealdolase [4.1.2.5]                       |
| rn:U0121 | false | L-Thr = 2-Oxobutanoate + NH <sub>3</sub>                                       | thereoninedehydratase [4.3.1.19]                           |
|          |       | Pribulosyl-formimino-AICAR-P = AICAR + D-erythro-1-(Imidazol-4-yl)glycerol_3-P | amidotransferasehisH [2.4.2.-]                             |
| rn:U0125 | false |                                                                                |                                                            |
|          |       | (5-P-D-R)anthranilate = 1-(2-Carboxyphenylamino)-1-deoxy-D-Ru_5-P              | phosphoriborylanthranilateisomerase [5.3.1.24]             |
| rn:U0126 | false |                                                                                |                                                            |
| rn:U0134 | false | Formimino-L-Glu = Formamide + L-Glu                                            | hypothetical protein,similartoformiminoglutamase [3.5.3.8] |
| rn:U0138 | false | O-P-L-homoSer = L-Thr                                                          | threoninesynthase [4.2.3.1]                                |
| rn:U0141 | false | D-E4P + PEP = DAHP                                                             | phospho-2-dehydro-3-deoxyheptonate aldo [2.5.1.54]         |
| rn:U0142 | false | PEP + Shi_3-P = 5-O-(1-Carboxyvinyl)-3-PShi                                    | 3-phosphoshikimate1-carboxyvinyltransferase [2.5.1.19]     |
| rn:U0143 | false | PR-AMP = PR-formimino-AICAR-P                                                  | histidinebiosynthesisbifunctionalproteinHisIE [3.5.4.19]   |
| rn:U0144 | false | PR-ATP = PR-AMP                                                                | histidinebiosynthesisbifunctionalproteinHisIE [3.6.1.31]   |
| rn:U0145 | false | PRPP = PR-ATP                                                                  | ATPphosphoribosyltransferase [2.4.2.17]                    |

## SEP reactions

|          |       |                                                                |                                                                 |
|----------|-------|----------------------------------------------------------------|-----------------------------------------------------------------|
| rn:U0146 | false | NAD <sup>+</sup> + Prephenate = 3-(4-Hydroxyphenyl)PYR + NADH  | prephenatedehydrogenase [1.3.1.12]                              |
| rn:U0147 | false | Prephenate = PhenylPYR                                         | prephenate dehydratase [4.2.1.51]                               |
| rn:U0155 | false | 3-DehydroShi + NADPH = NADP <sup>+</sup> + Shi                 | shikimatedehydrogenase [1.1.1.25]                               |
| rn:U0160 | false | Urea = 2 NH <sub>3</sub>                                       | urease [3.5.1.5]                                                |
| rn:U0166 | false | 3-(Imidazol-4-yl)-2-oxopropyl_P + L-Glu = AKG + L-Histidinol_P | putative histidinol-phosphateaminotransferase [2.6.1.9]         |
| rn:U0167 | false | L-Glu + PhenylPYR = AKG + L-PhenylAla                          | putativehistidinol-phosphateaminotransferase [2.6.1.9]          |
| rn:U0168 | false | 3-(4-Hydroxyphenyl)PYR + L-Glu = AKG + L-Tyr                   | putative histidinol-phosphatetransaminase [2.6.1.9]             |
| rn:U0179 | false | Acetaldehyde + NAD <sup>+</sup> = Ac + NADH                    | aldehyde dehydrogenase [1.2.1.3]                                |
| rn:U0188 | false | DHQ = 3-DehydroShi                                             | enolase [4.2.1.11, 4.2.1.10]                                    |
| rn:U0195 | false | PYR + Thiamin_diP = 2-(A-Hydroxyethyl)thiamine_diP             | pyruvate dehydrogenase_ acetolactatesynthase [1.2.4.1, 2.2.1.6] |
| rn:U0198 | false | O-Ac-L-Ser = Ac + L-Cys                                        | cysteinesynthase [2.5.1.47]                                     |
| rn:U0208 | false | NH <sub>3</sub> = Carbamoyl_P                                  | carbamatekinase [2.7.2.2]                                       |
| rn:U0209 | false | D-Ala = L-Ala                                                  | alanineracemase [5.1.1.1]                                       |
| rn:U0238 | false | GA_P + NAD <sup>+</sup> = 3-P-D-glyceroyl_P + NADH             | glyceraldehyde-3-phosphate dehydrogenase [1.2.1.12]             |
| rn:U0239 | false | Glycerone_P = GA_P                                             | triosephosphate isomerase [5.3.1.1]                             |
| rn:U0243 | false | Mal + Menaquinone = Menaquinol + OAA                           | malate:quinoneoxidoreductase [1.1.99.16]                        |
| rn:U0244 | false | Mal + NAD <sup>+</sup> = NADH + OAA                            | MDH [1.1.1.37]                                                  |
| rn:U0245 | true  | Mal + NAD <sup>+</sup> = NADH + PYR                            | malatedehydrogenase homolog [1.1.1.38]                          |
| rn:U0246 | false | Fum = Mal                                                      | fumarate hydratase, class-II [4.2.1.2]                          |
| rn:U0255 | false | 3-P-D-GA = 2-P-D-GA                                            | phosphoglycerate mutase [5.4.2.1]                               |
| rn:U0256 | false | 2-P-D-GA = PEP                                                 | enolase [4.2.1.11]                                              |
| rn:U0260 | false | 6PGlucon + NADP <sup>+</sup> = D-Ru_5-P + NADPH                | phosphogluconate dehydrogenase [1.1.1.44]                       |
| rn:U0267 | false | Ac-CoA + OAA = Cit + CoA                                       | citrate synthase [2.3.3.1]                                      |
| rn:U0269 | false | PEP = PYR                                                      | pyruvate kinase [2.7.1.40]                                      |
| rn:U0270 | false | 3-P-D-glyceroyl_P = 3-P-D-GA                                   | phosphoglycerate kinase [2.7.2.3]                               |
| rn:U0271 | false | Ac + CoA = Ac-CoA                                              | acetyl-CoA synthetase AND ligase [6.2.1.1]                      |
| rn:U0274 | false | D-F = D-F_6-P                                                  | fructokinase,putative [2.7.1.4]                                 |
| rn:U0276 | false | D-F_6-P = D-F_16-BP                                            | 6-phosphofructokinase [2.7.1.11]                                |
| rn:U0280 | false | D-Ri_5-P = PRPP                                                | ribose-phosphate pyrophosphokinase [2.7.6.1]                    |
| rn:U0284 | false | OAA = PEP                                                      | phosphoenolpyruvate carboxykinase [4.1.1.49]                    |
| rn:U0287 | false | PYR = OAA                                                      | pyruvate carboxylase [6.4.1.1]                                  |
| rn:U0288 | true  | CoA + Succ = SuccCoA                                           | succinyl-CoA synthetase [6.2.1.5]                               |
| rn:U0294 | false | D-F_16-BP = D-F_6-P                                            | fructose-bisphosphatase [3.1.3.11]                              |
| rn:U0295 | true  | D-F_6-P + GA_P = D-E4P + D-Xu_5-P                              | transketolase [2.2.1.1]                                         |
| rn:U0297 | false | D-Glucono-15-lactone_6-P = 6PGlucon                            | Spon_PGLactonohydrolase [3.1.1.31]                              |
| rn:U0301 | false | D-G_6-P + NADP <sup>+</sup> = D-Glucono-15-lactone_6-P + NADPH | glucose-6-phosphate 1-dehydrogenase [1.1.1.49]                  |
| rn:U0302 | false | D-G_6-P = D-F_6-P                                              | glucose-6-phosphate isomerase A [5.3.1.9]                       |
| rn:U0311 | false | D-Ru_5-P = D-Ri_5-P                                            | ribose 5-phosphate isomerase A [5.3.1.6]                        |

SEP reactions

|          |       |                                                                                                     |                                                                  |
|----------|-------|-----------------------------------------------------------------------------------------------------|------------------------------------------------------------------|
| rn:U0314 | false | D-Ru_5-P = D-Xu_5-P                                                                                 | ribulose-phosphate 3-epimerase [5.1.3.1]                         |
| rn:U0315 | true  | D-S7P + GA_P = D-E4P + D-F_6-P                                                                      | Transaldolase superfamily [2.2.1.2]                              |
| rn:U0316 | true  | D-S7P + GA_P = D-Ri_5-P + D-Xu_5-P                                                                  | transketolase [2.2.1.1]                                          |
| rn:U0324 | false | IsoCit + NADP+ = NADPH + OASucc                                                                     | isocitrate dehydrogenase [1.1.1.42]                              |
| rn:U0335 | false | OASucc = AKG                                                                                        | isocitrate dehydrogenase [1.1.1.42]                              |
| rn:U0345 | false | FAD(ex) + Succ = FADH2(ex) + Fum                                                                    | succinate dehydrogenase [1.3.99.1]                               |
| rn:U0348 | false | Sucrose_6-P = D-F + D-G_6-P                                                                         | sucrose-6-phosphatehydrolase [3.2.1.26]                          |
| rn:U0358 | false | cis-Acon = IsoCit                                                                                   | aconitate hydratase [4.2.1.3]                                    |
| rn:U0359 | false | Cit = cis-Acon                                                                                      | aconitate hydratase [4.2.1.3]                                    |
| rn:U0360 | false | D-F_16-BP = GA_P + Glycerone_P                                                                      | fructose-bisphosphate aldolase [4.1.2.13]                        |
| rn:U0372 | false | AKG + L-Gln + NADPH = 2 L-Glu + NADP+                                                               | glutamatesynthase [1.4.1.13]                                     |
| rn:U0522 | true  | NH3(ex) = NH3                                                                                       | probabile ammonium transporter [2.A.49]                          |
| rn:U0534 | false | D-G(ex) + PEP = D-G_6-P + PYR                                                                       | glucose-specific PTS [2.7.1.69, 2.7.3.9]                         |
| rn:U0673 | true  | AKG + D-Ala = D-Glu + PYR                                                                           | D-alanineaminotransferase [2.6.1.21]                             |
| rn:U0986 | false | 2 L-Glu + NADH = AKG + L-Orn + NAD+                                                                 | EZComp_UreaOrnSyn [1.5.1.12, 2.6.1.13]                           |
| rn:U0987 | false | 2345-Tetrahydrodipicolinate + L-Glu + SuccCoA = AKG + CoA + L-Lys + Succ                            | EZComp_LysSyn [2.3.1.117, 2.6.1.17, 3.5.1.18, 5.1.1.7, 4.1.1.20] |
| rn:U0988 | false | AKG + CoA + NAD+ = NADH + SuccCoA                                                                   | EZComp_TCASuccinyl [1.2.4.2, 2.3.1.61, 1.8.1.4]                  |
| rn:U0989 | false | 2-(A-Hydroxyethyl)thiamine_diP + 2-Oxobutanoate + L-Glu + NADPH = AKG + L-Ile + NADP+ + Thiamin_diP | EZComp_Ile_Meta [2.2.1.6, 1.1.1.86, 4.2.1.9, 2.6.1.42]           |
| rn:U0990 | false | 2-(A-Hydroxyethyl)thiamine_diP + NADPH + PYR = 3-Methyl-2-oxobutanoate + NADP+ + Thiamin_diP        | EZComp_Val_Meta [2.2.1.6, 1.1.1.86, 4.2.1.9]                     |
| rn:U0991 | false | 3-Methyl-2-oxobutanoate + Ac-CoA + L-Glu + NAD+ = AKG + CoA + L-Leu + NADH                          | EZComp_Leu_Meta [2.3.3.13, 4.2.1.33, 1.1.1.85, 2.6.1.42]         |
| rn:U0993 | false | L-Asp + L-Citrulline = Fum + L-Arg                                                                  | EZComp_Fum_Asp [4.3.2.1, 6.3.4.5]                                |
| rn:U0994 | false | CoA + NAD+ + PYR = Ac-CoA + NADH                                                                    | EZComp_PyrAcetylCoA [1.2.4.1, 2.3.1.12, 1.8.1.4]                 |
| rn:U0995 | false | Gly + NAD+ + THF = 510-MethyleneTHF + NADH + NH3                                                    | EZComp_GlySerThrMeta [2.1.2.10, 1.8.1.4, 1.4.4.2]                |
| rn:U0996 | false | Ac-CoA + L-Cys + L-HomoSer = Ac + CoA + L-HomoCys + NH3 + PYR                                       | EZComp_MetMeta [2.3.1.31, 2.5.1.48, 4.4.1.8]                     |
| rn:U0997 | false | AKG + L-Orn + NADH + 2 NADPH = 2 L-Pro + NAD+ + 2 NADP+                                             | EZComp_UreaMeta [1.5.1.2, 1.5.1.12, 2.6.1.13]                    |

**Table 15: *S. epidermidis* network - Elementary Modes discussed in the results section<sup>1</sup>**

| #  | Flux | sum   | Rev. <sup>2</sup> | Length                                                                                                                                                                                                                                                                                                                                                                                                                                  | Reactions <sup>3</sup>                                                                                                 | Net reaction |
|----|------|-------|-------------------|-----------------------------------------------------------------------------------------------------------------------------------------------------------------------------------------------------------------------------------------------------------------------------------------------------------------------------------------------------------------------------------------------------------------------------------------|------------------------------------------------------------------------------------------------------------------------|--------------|
| 16 | 27   | false | 22                | (1 m:E0019) (1 m:N02) (1 m:U0038) (1 m:U0061) (1 m:U0195) (2 m:U0238) (1 m:U0239) (2 m:U0255) (2 m:U0256) (1 m:U0260) (2 m:U0270) (1 m:U0276) (1 m:U0280) (1 m:U0297) (1 m:U0301) (1 m:U0302) (1 m:U0311) (1 m:U0360) (1 m:U0372) (1 m:U0522) (2 m:U0534) (1 m:U0990)                                                                                                                                                                   | 4 D-G(ex) + 6 NAD <sup>+</sup> + 5 NH <sub>3</sub> (ex) = 2 Ala-tRNA(ex) + 6 NADH + Phe-tRNA(ex) + 2 Ser-tRNA(ex)      |              |
| 17 | 148  | false | 25                | (6 m:E0019) (6 m:U0038) (6 m:U0061) (6 m:U0195) (12 m:U0238) (5 m:U0239) (12 m:U0255) (12 m:U0256) (6 m:U0260) (5 m:U0269) (12 m:U0270) (5 m:U0276) (-2 m:U0295) (6 m:U0297) (6 m:U0301) (1 m:U0302) (2 m:U0311) (4 m:U0314) (2 m:U0315) (-2 m:U0316) (5 m:U0360) (6 m:U0372) (6 m:U0522) (7 m:U0534) (6 m:U0990)                                                                                                                       | 7 D-G(ex) + 12 NAD <sup>+</sup> + 6 NH <sub>3</sub> (ex) = 12 NADH + 6 Val-tRNA(ex)                                    |              |
| 18 | 221  | false | 30                | (5 m:E0019) (4 m:N02) (5 m:U0038) (15 m:U0061) (10 m:U0089) (10 m:U0093) (5 m:U0195) (10 m:U0238) (4 m:U0239) (10 m:U0244) (10 m:U0246) (10 m:U0255) (10 m:U0256) (10 m:U0260) (10 m:U0270) (4 m:U0276) (4 m:U0280) (-2 m:U0295) (10 m:U0297) (10 m:U0301) (6 m:U0311) (4 m:U0314) (2 m:U0315) (-2 m:U0316) (4 m:U0360) (15 m:U0372) (5 m:U0522) (10 m:U0534) (5 m:U0990) (10 m:U0993)                                                  | 2 D-G(ex) + 2 NAD <sup>+</sup> + NH <sub>3</sub> (ex) = 2 NADH + Pyrimidine(ex) + Val-tRNA(ex)                         |              |
| 22 | 294  | false | 34                | (5 m:E0012) (5 m:E0018) (6 m:N02) (5 m:U0047) (5 m:U0059) (15 m:U0061) (5 m:U0062) (10 m:U0093) (-5 m:U0106) (5 m:U0121) (5 m:U0138) (5 m:U0195) (15 m:U0238) (6 m:U0239) (10 m:U0244) (-10 m:U0245) (15 m:U0255) (15 m:U0256) (15 m:U0260) (15 m:U0270) (6 m:U0276) (6 m:U0280) (-3 m:U0295) (15 m:U0297) (15 m:U0301) (9 m:U0311) (6 m:U0314) (3 m:U0315) (-3 m:U0316) (6 m:U0360) (15 m:U0372) (10 m:U0522) (15 m:U0534) (5 m:U0989) | 9 D-G(ex) + 13 NAD <sup>+</sup> + 11 NH <sub>3</sub> (ex) = 9 Cys-tRNA(ex) + 13 NADH + 2 Phe-tRNA(ex) + Pyrimidine(ex) |              |

<sup>1</sup> complete list available from the authors on request<sup>2</sup> reversible<sup>3</sup> reaction identifiers are taken from KEGG, for annotations see the reaction table
